# Supplementary material
Source: PubMed Central journal article supplement (PMC5823610)

52

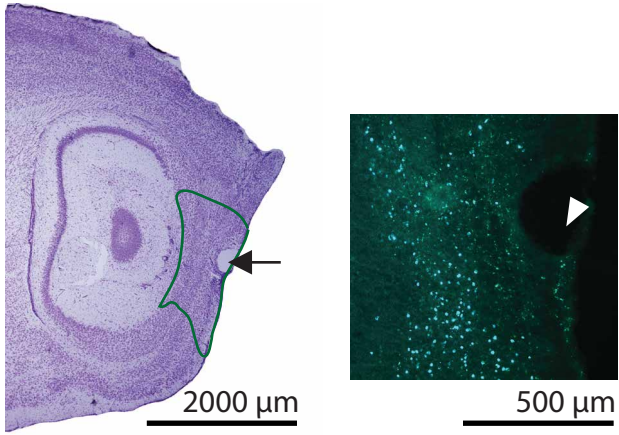

61

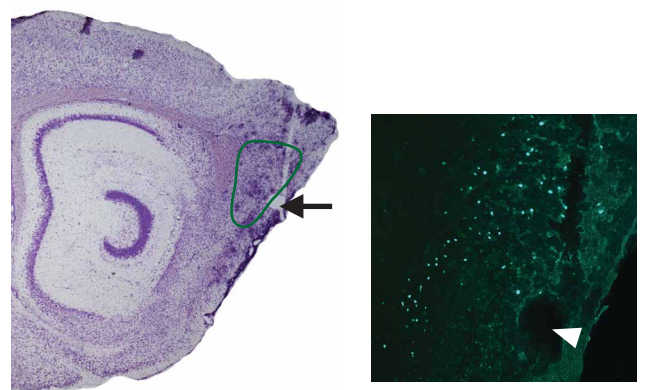

47

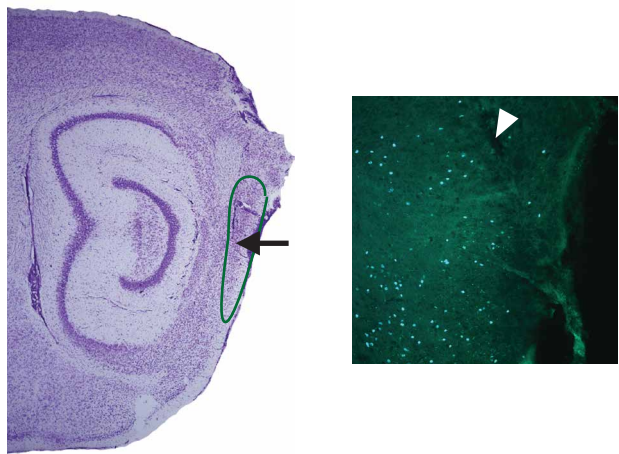

46

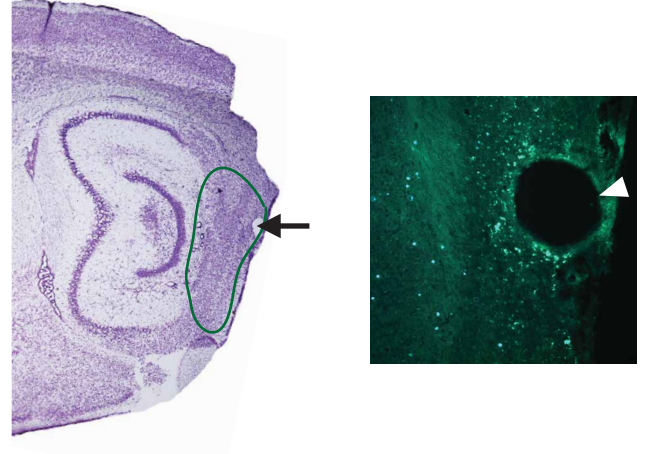

74

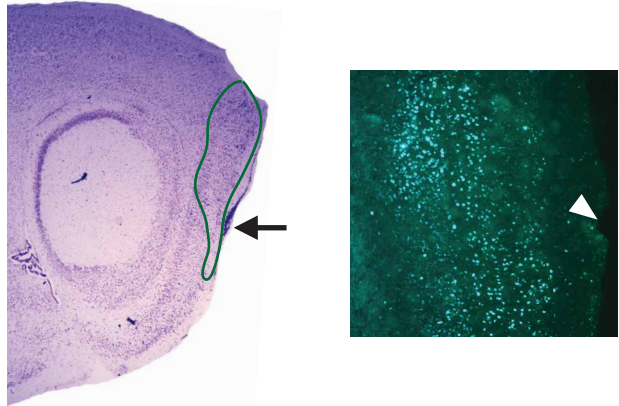

60

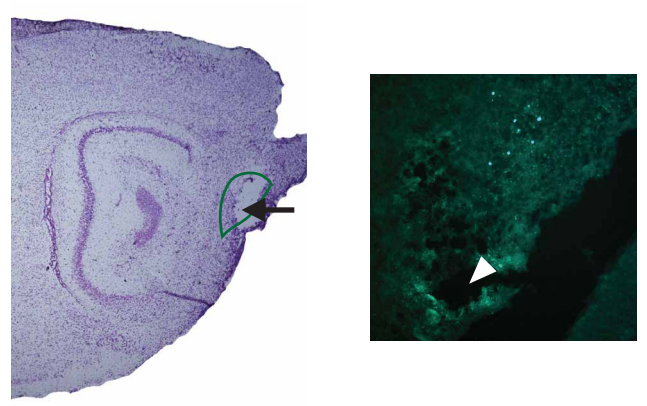

79

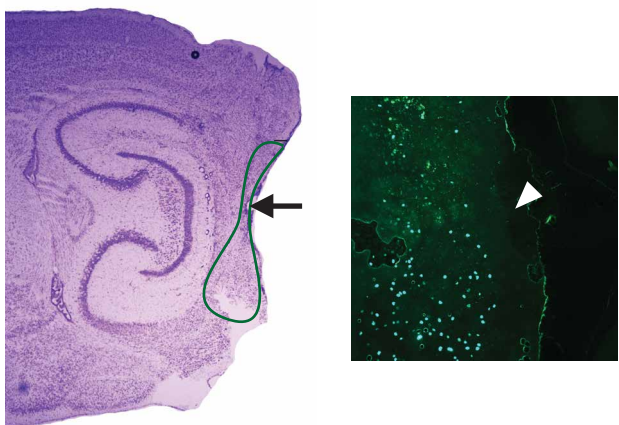

48

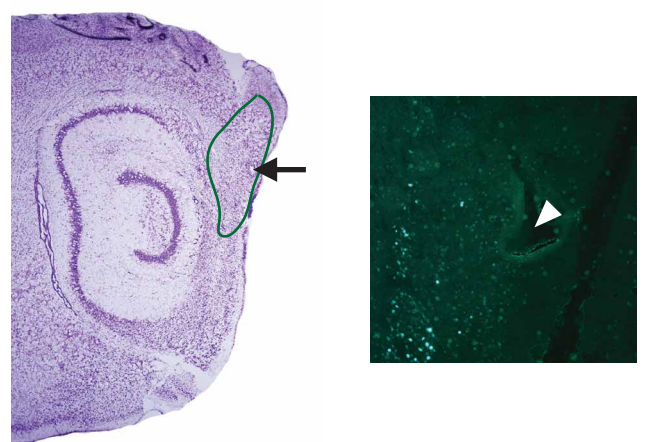

68

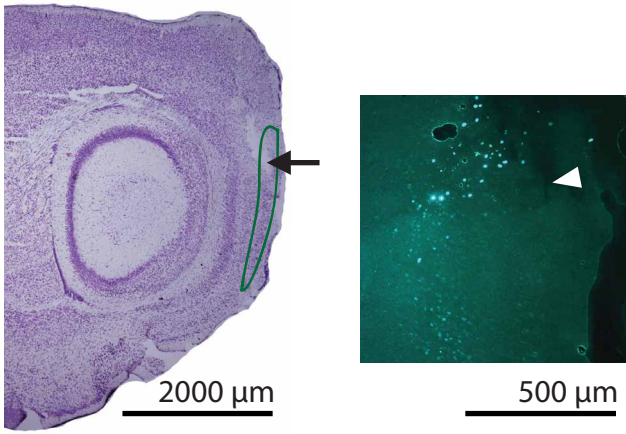

32

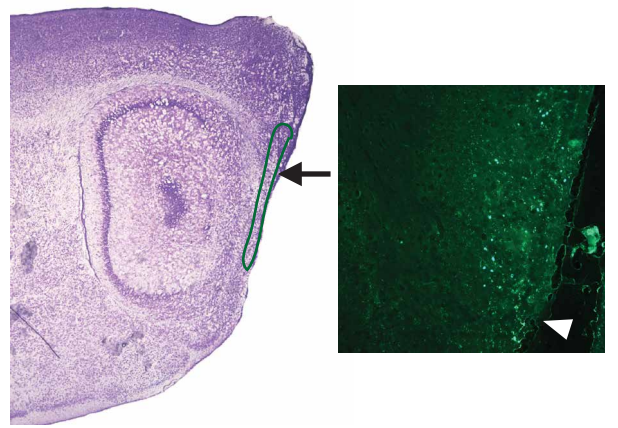

37

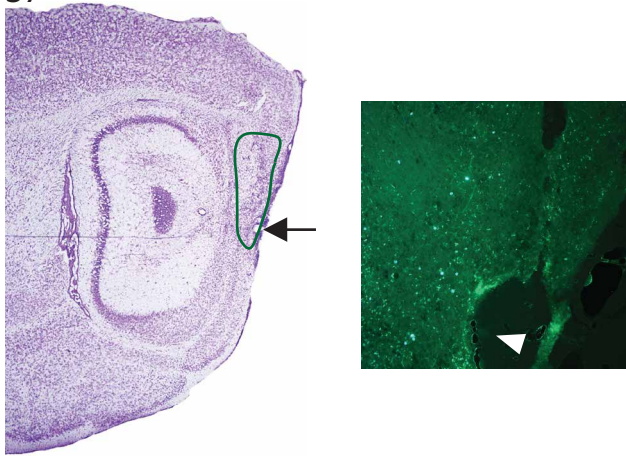

81

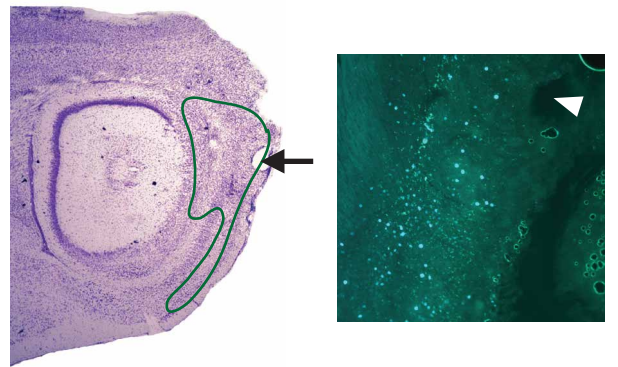

59

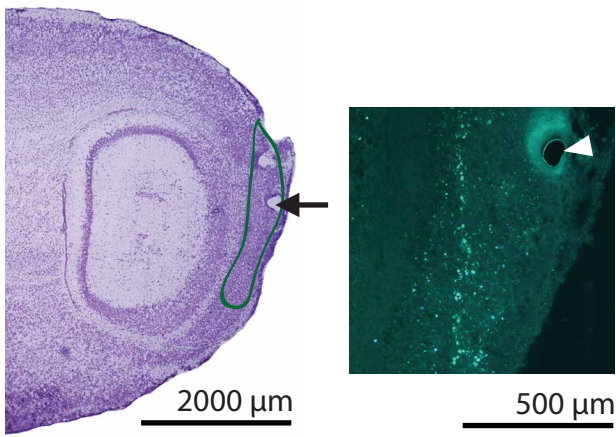

70

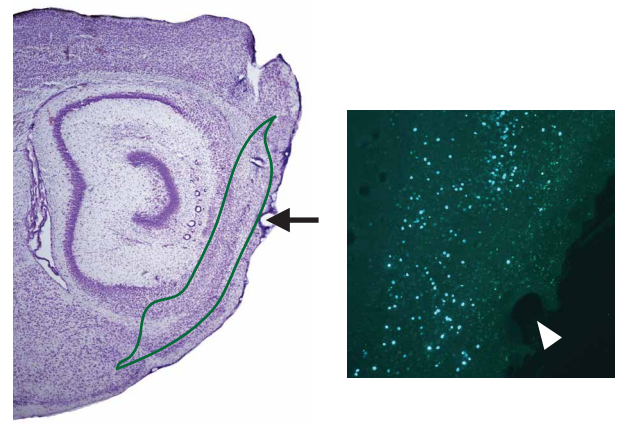

66

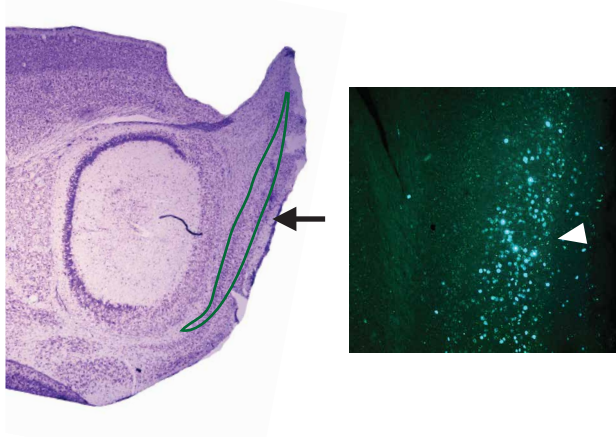

23

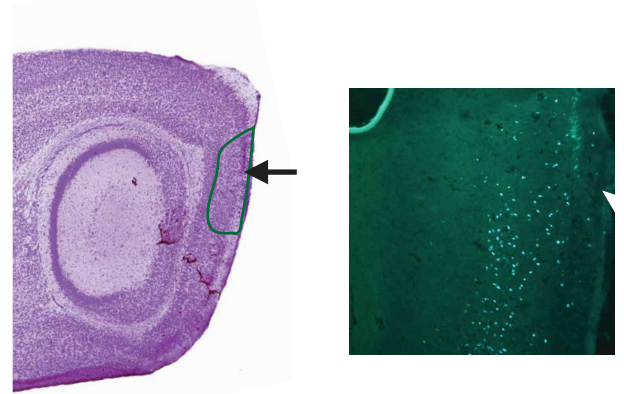

82

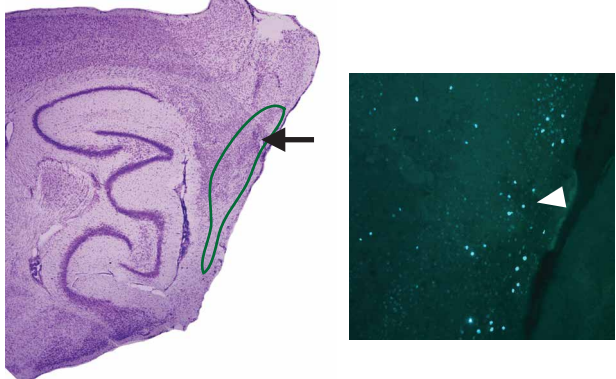

75

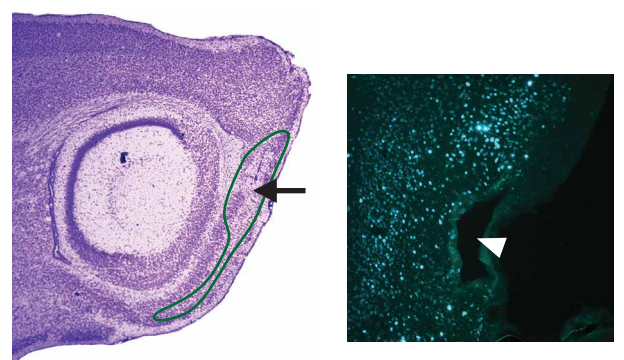

63

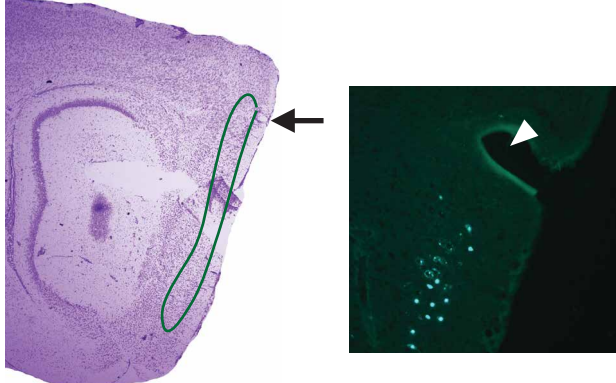

54

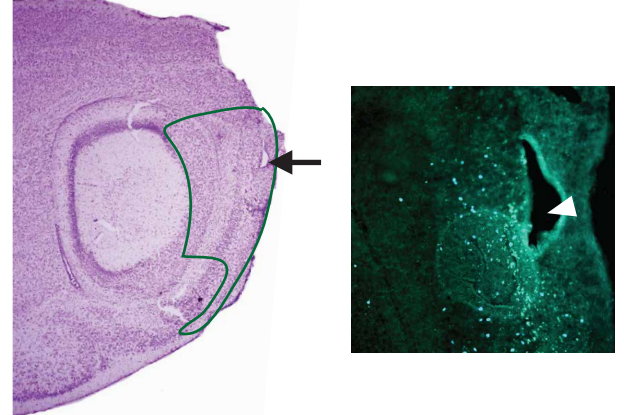

18

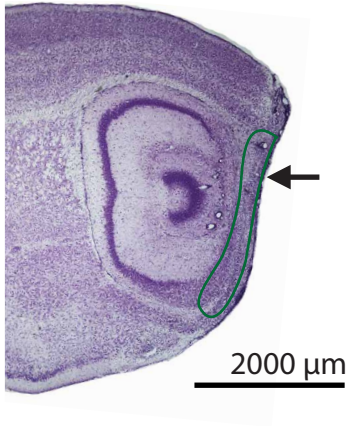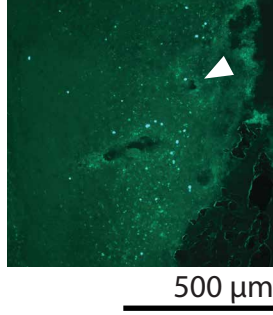

67

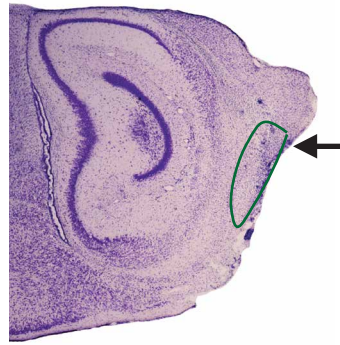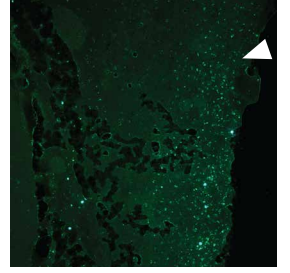

53

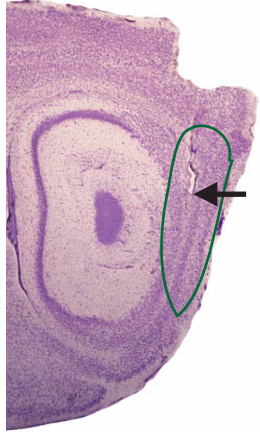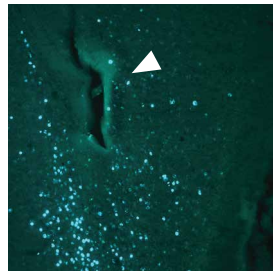

56

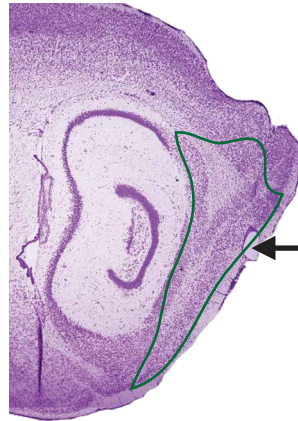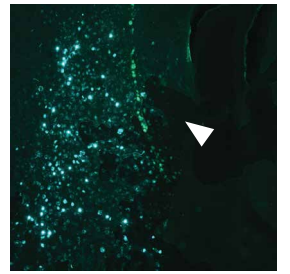

42

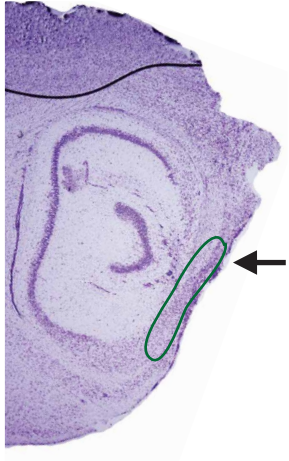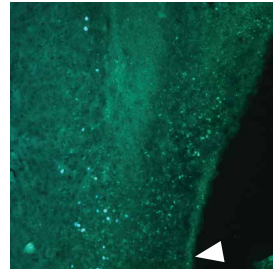

77

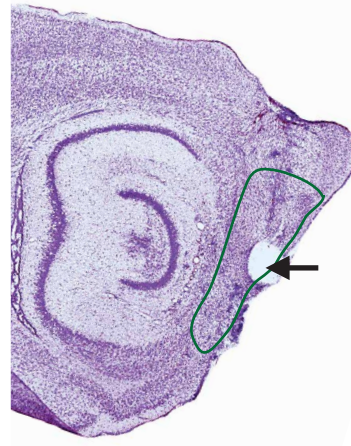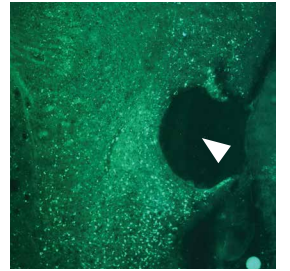

65

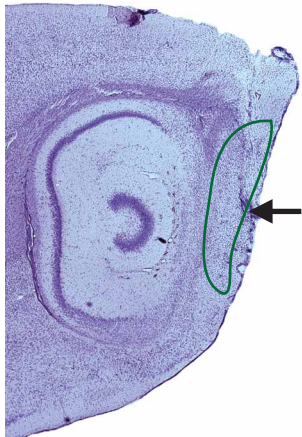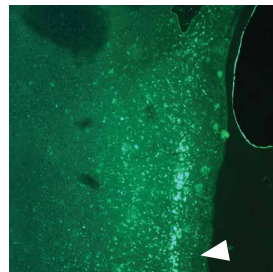

110

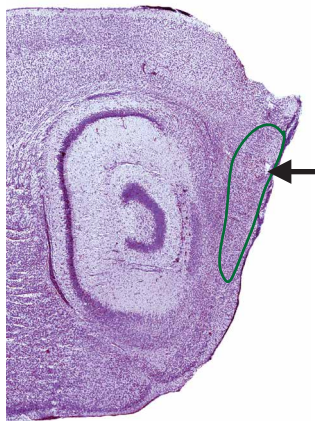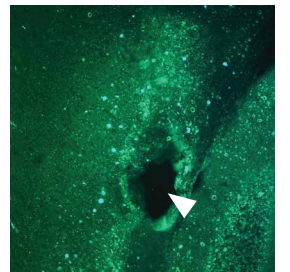

108

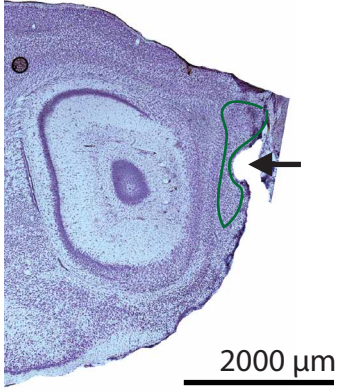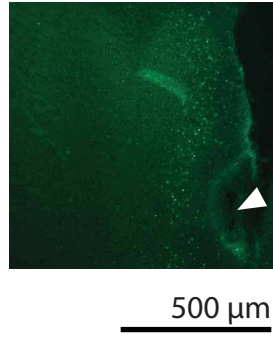

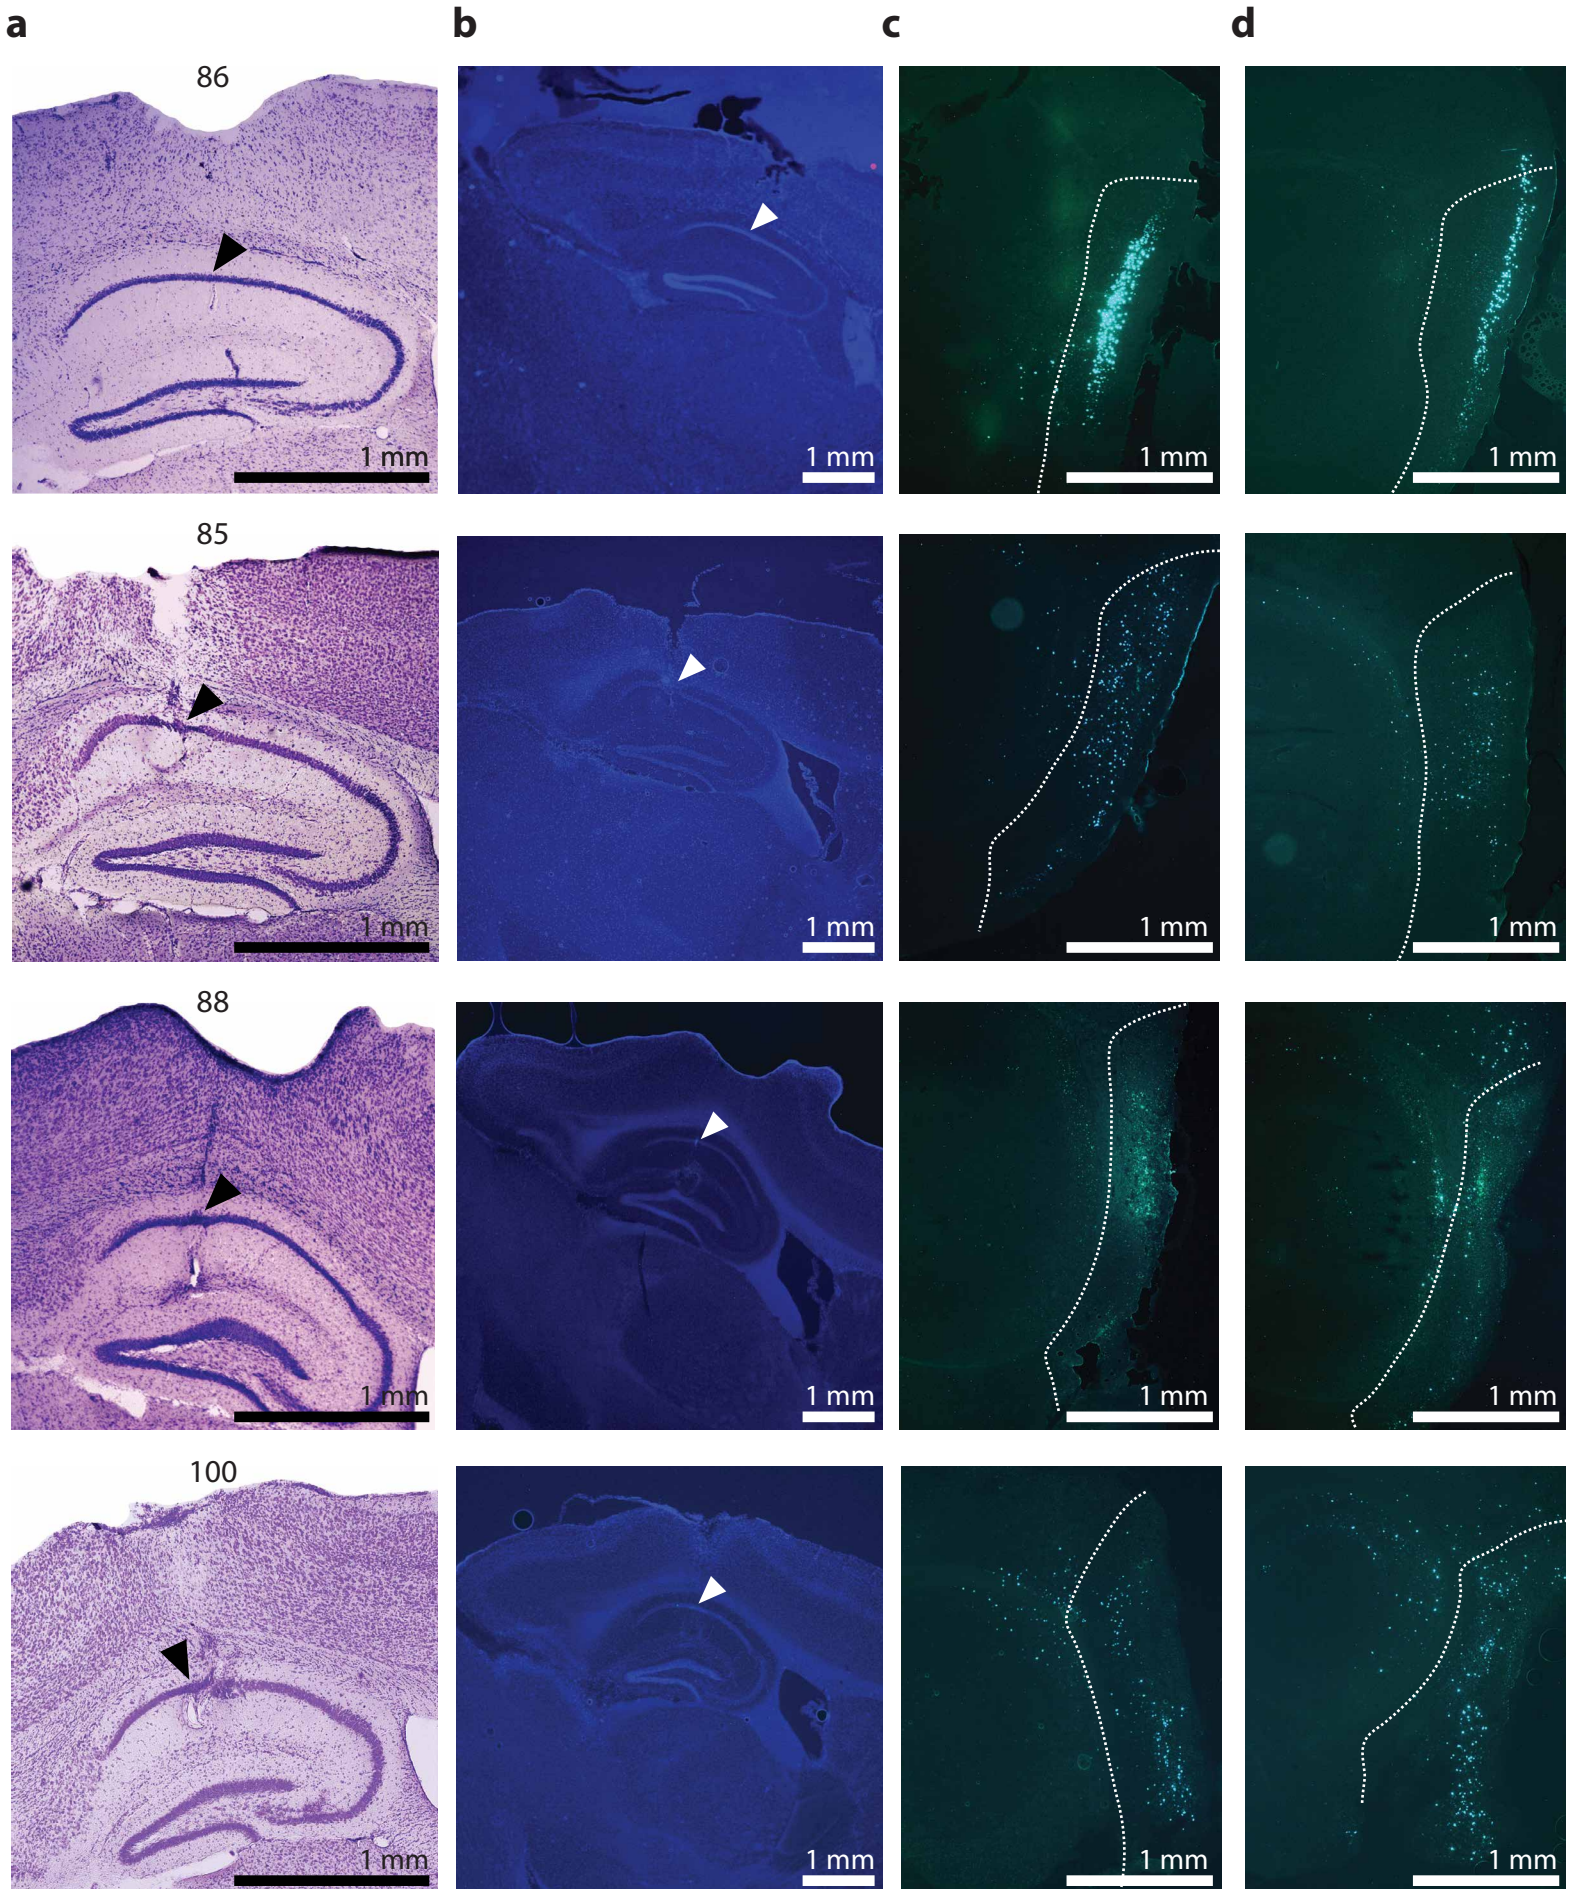

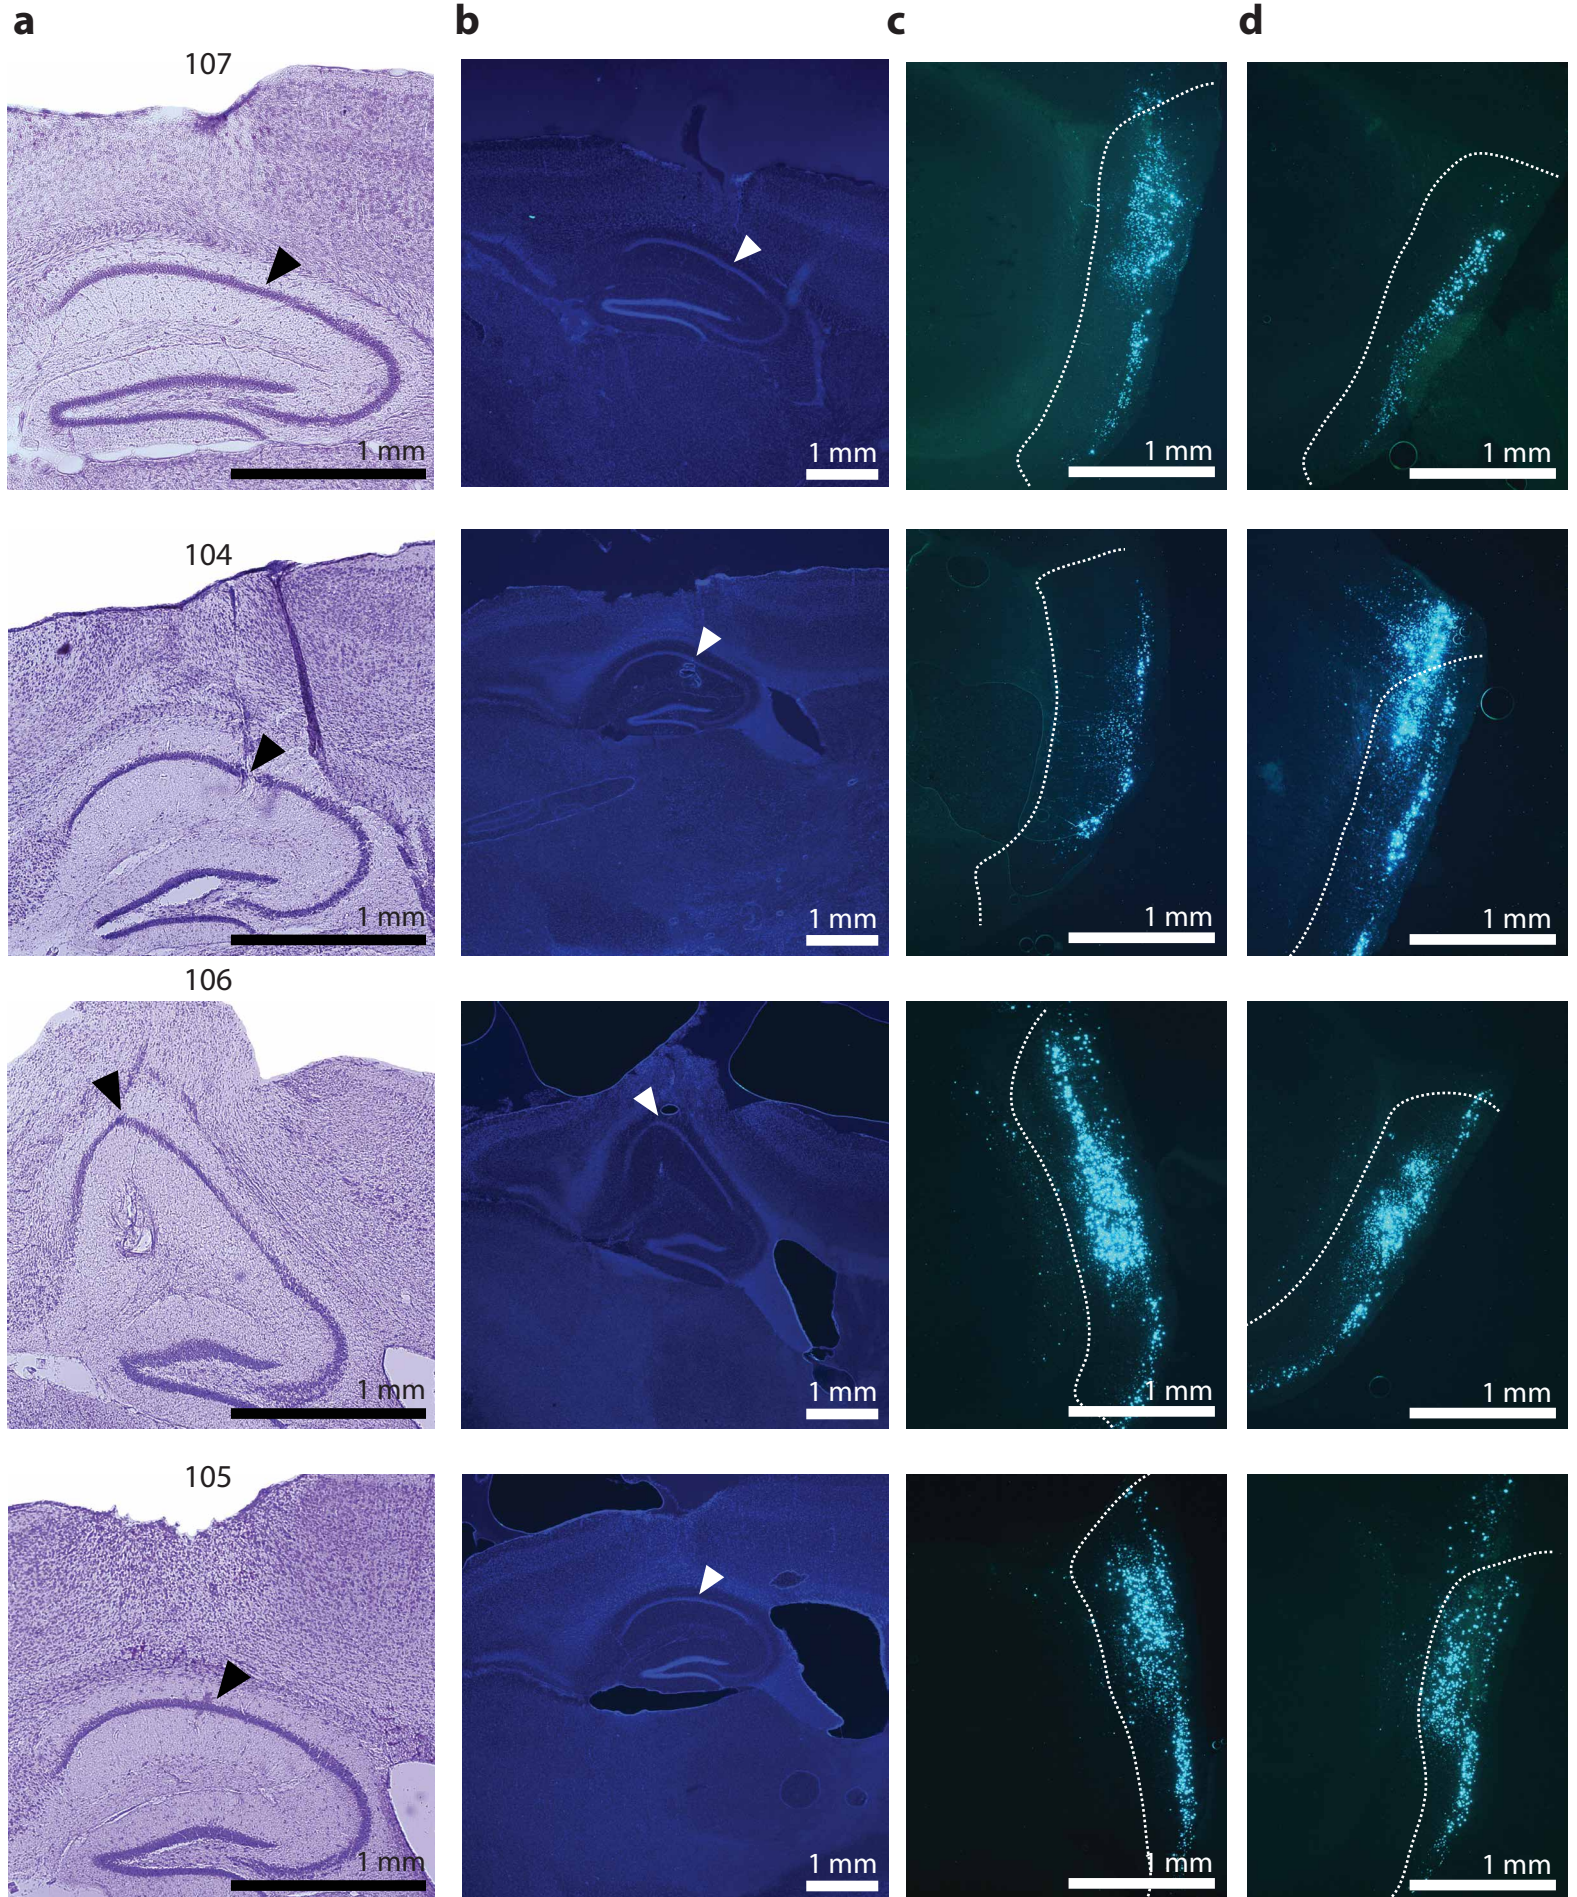

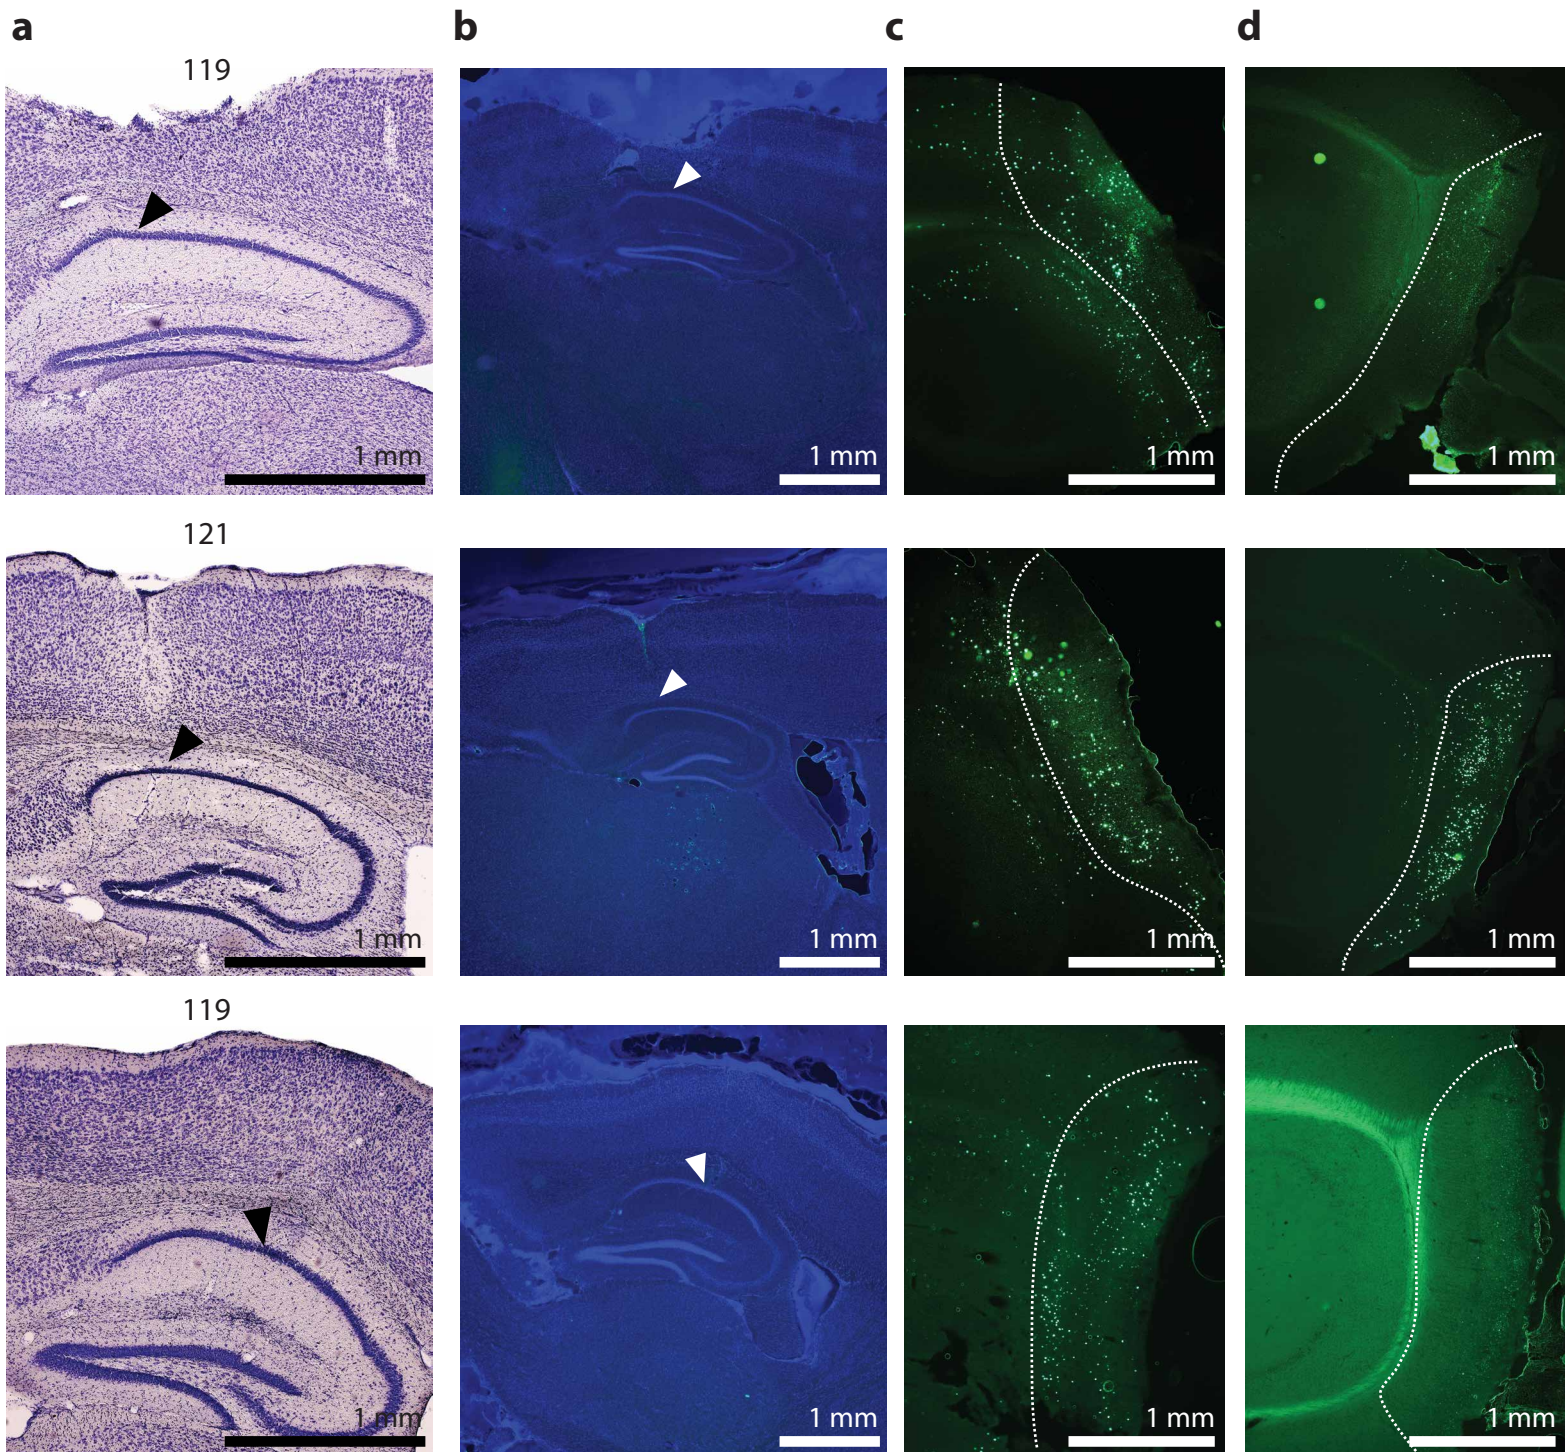



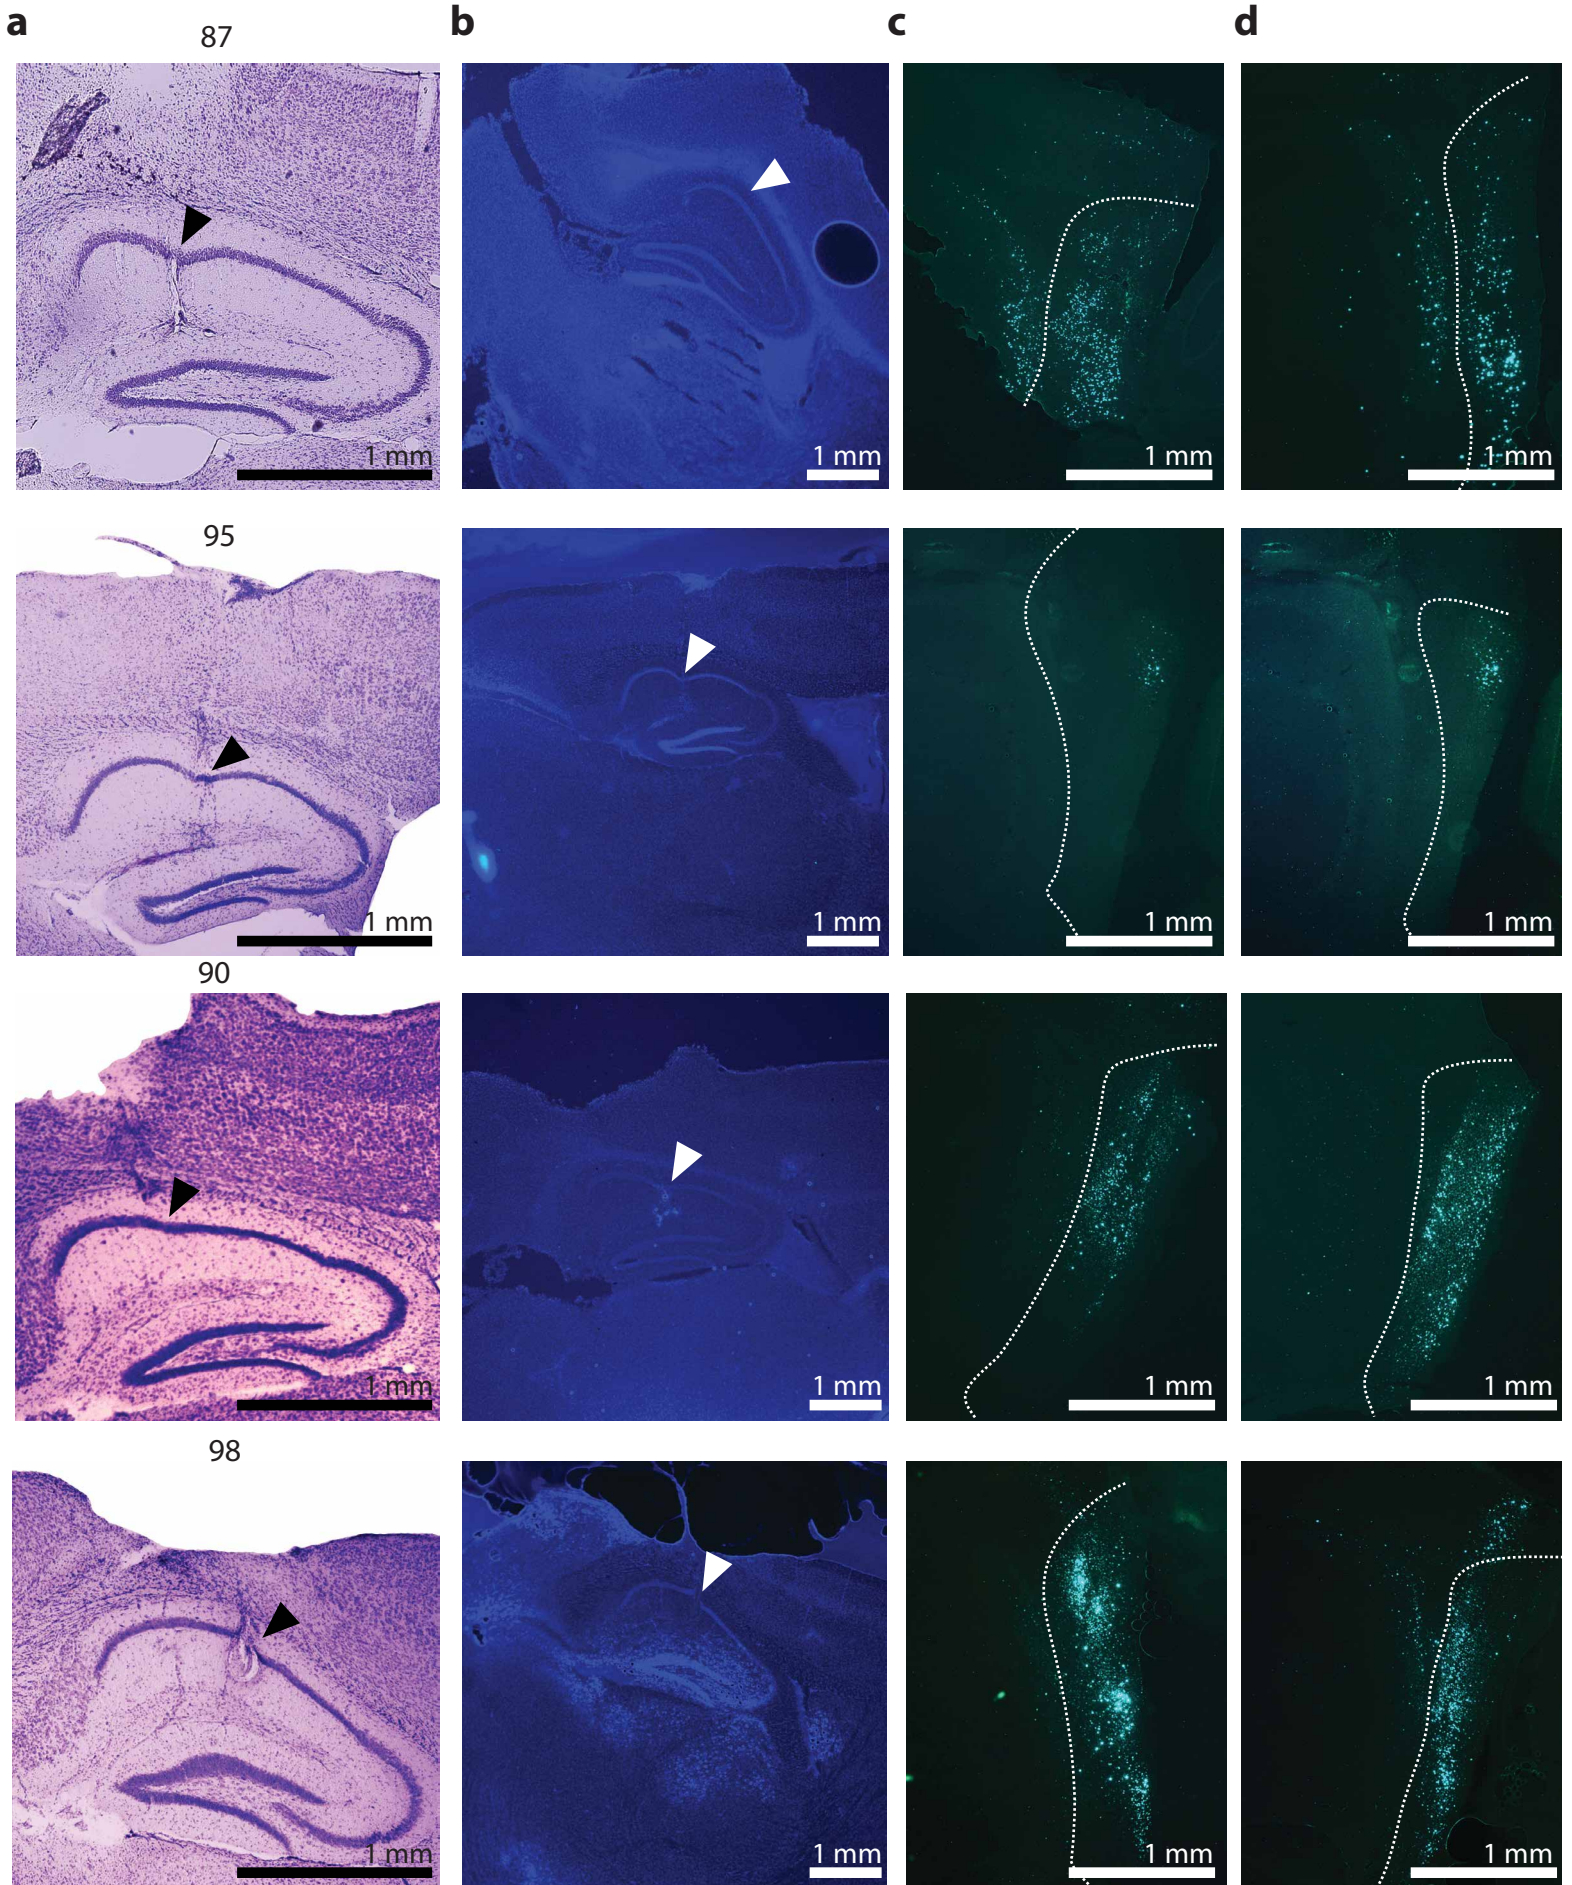

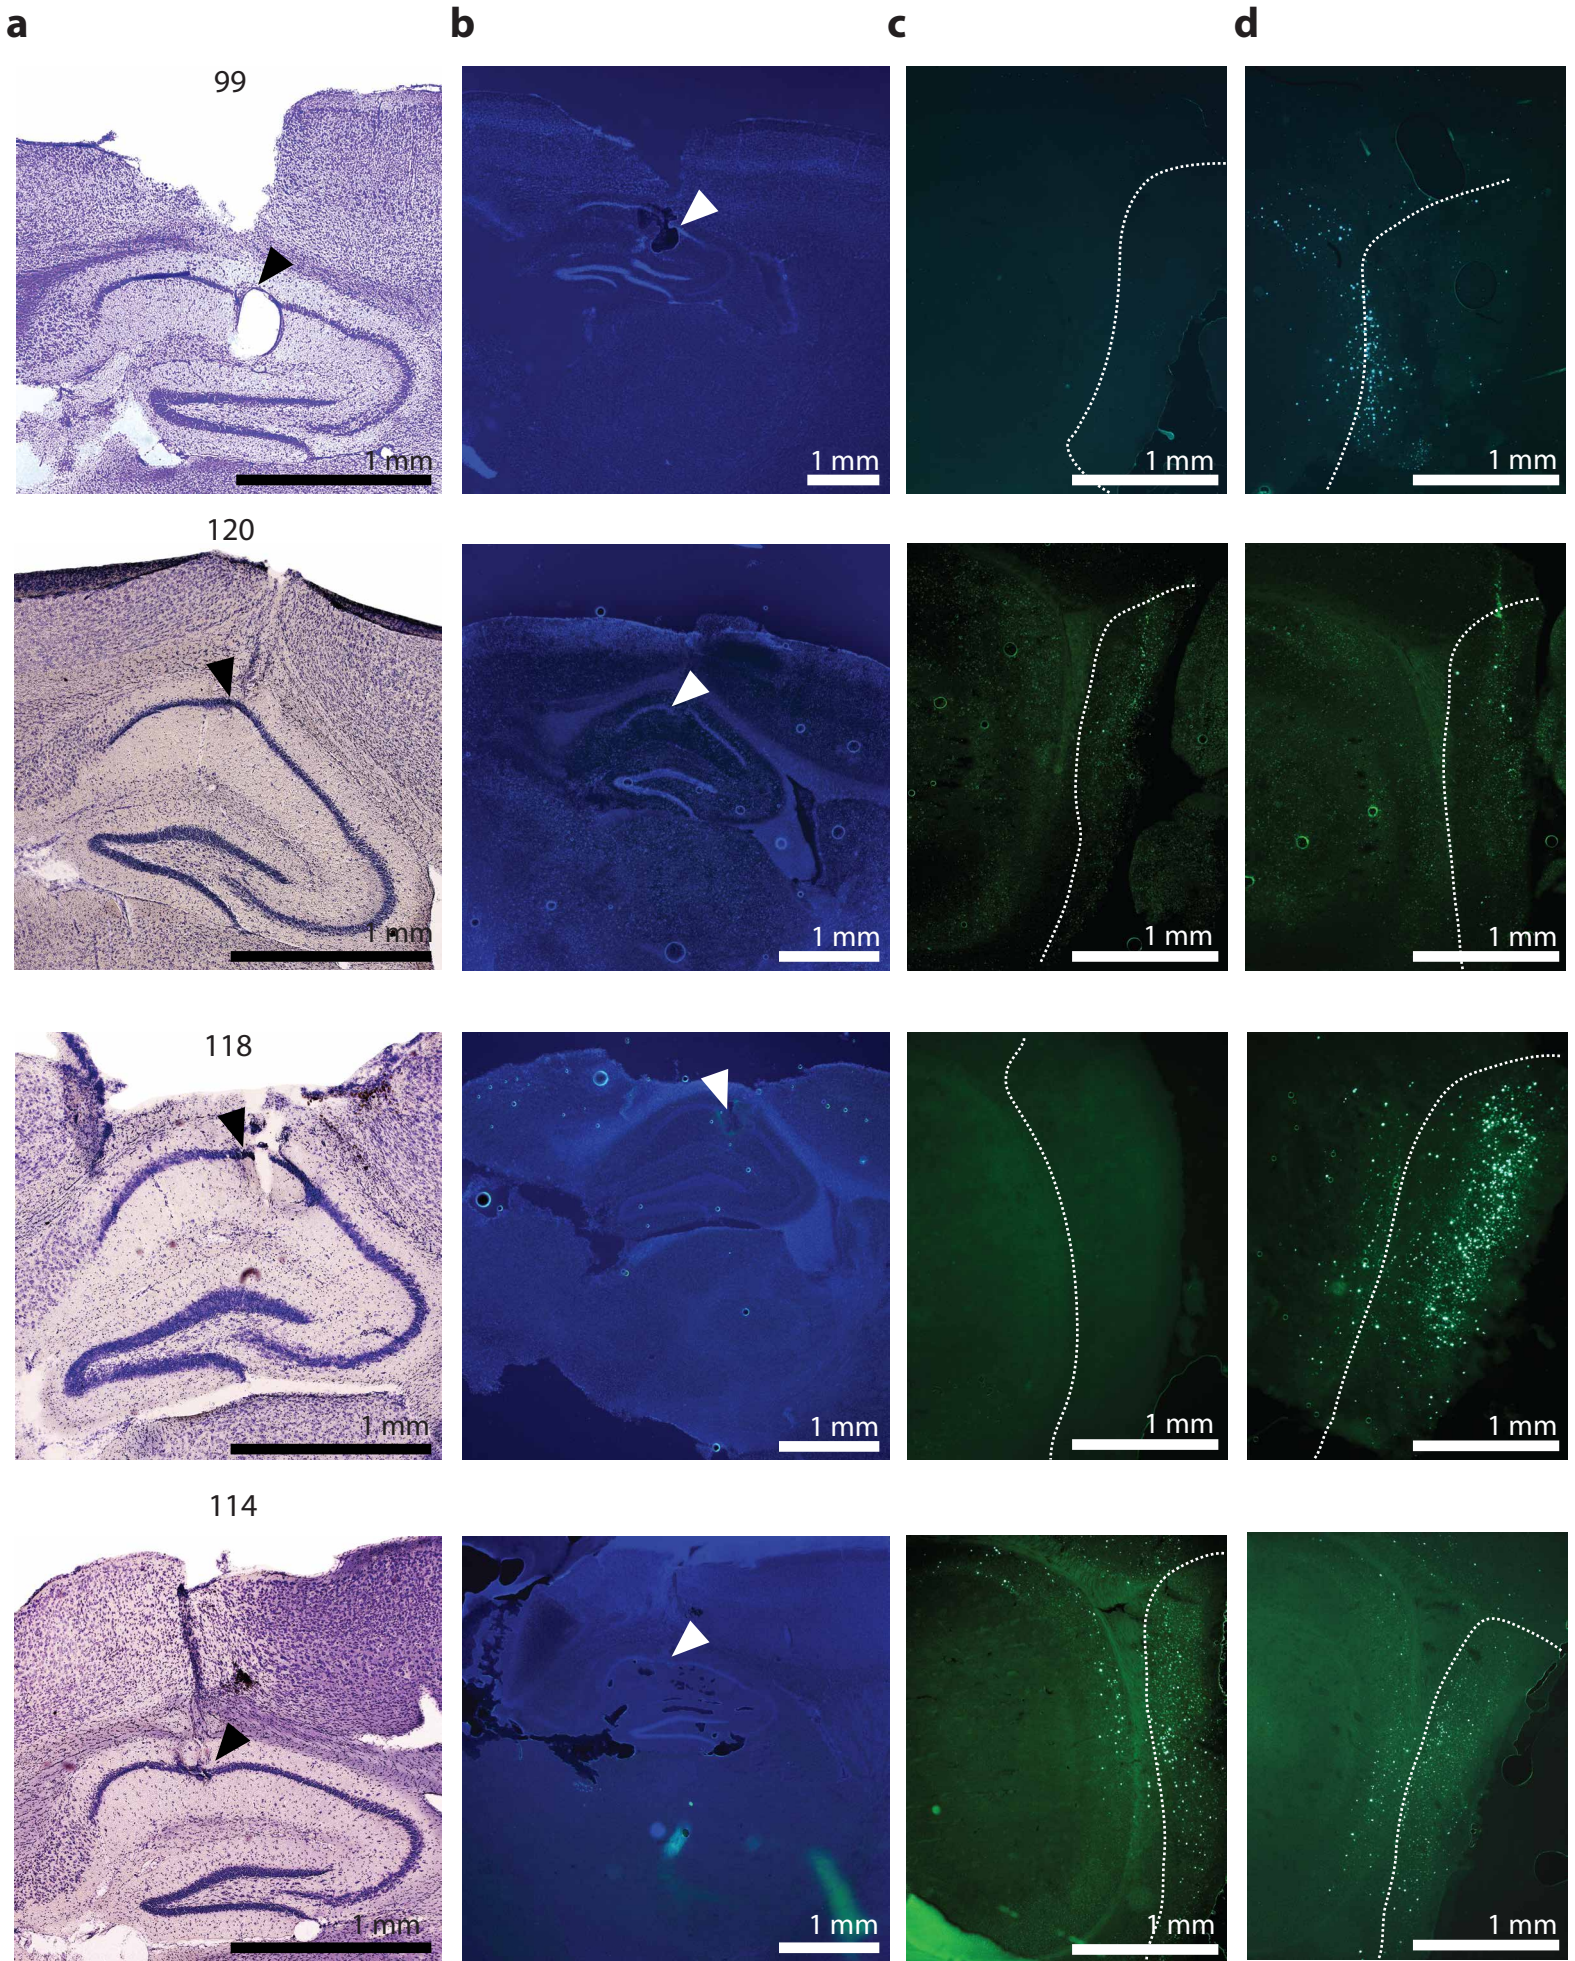

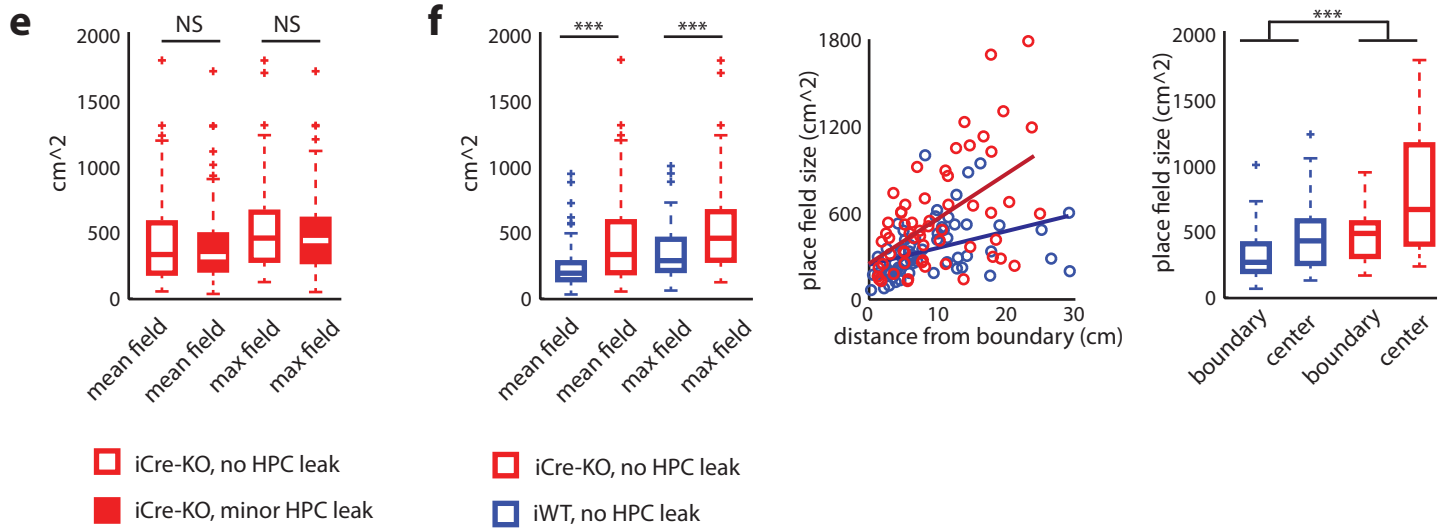

a

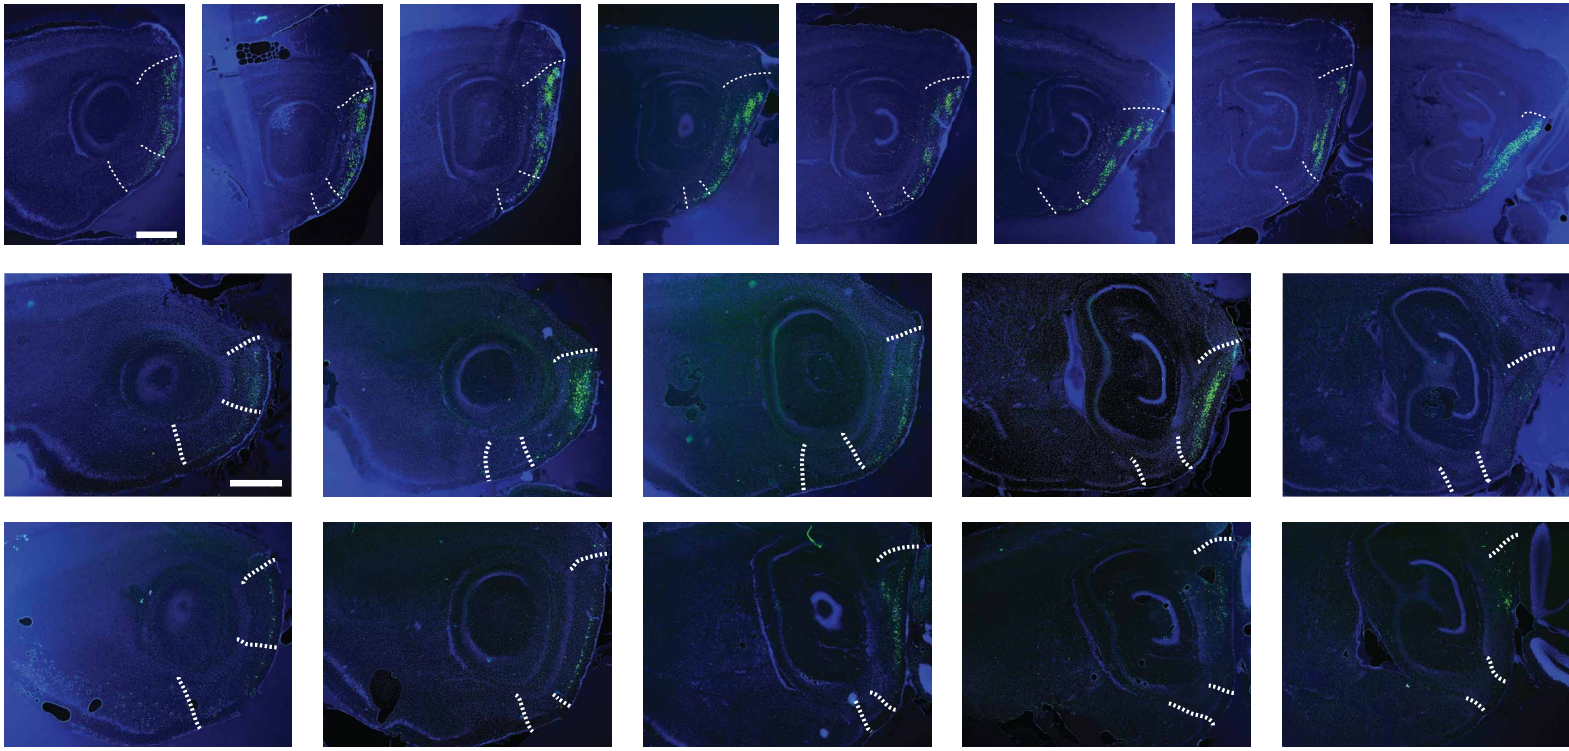

b

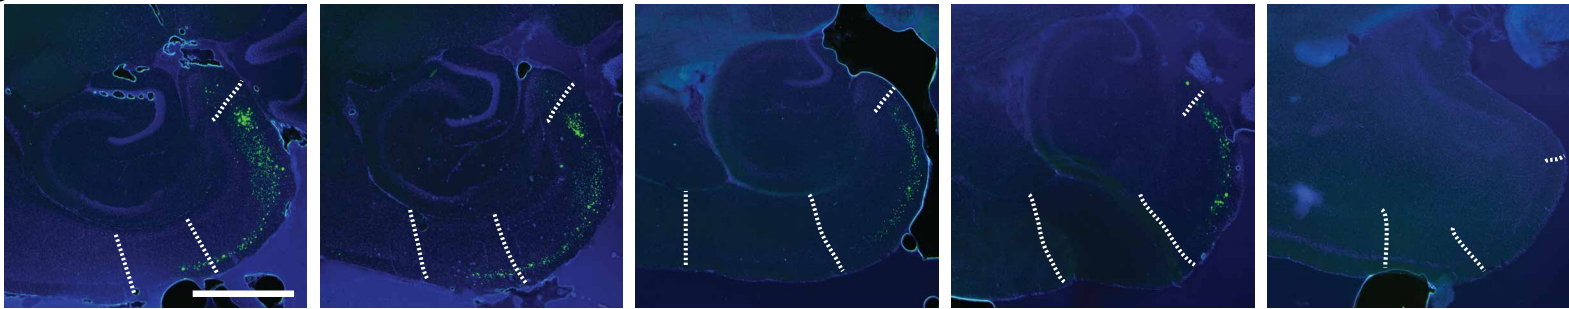

## Injected Wildtype (iWT)

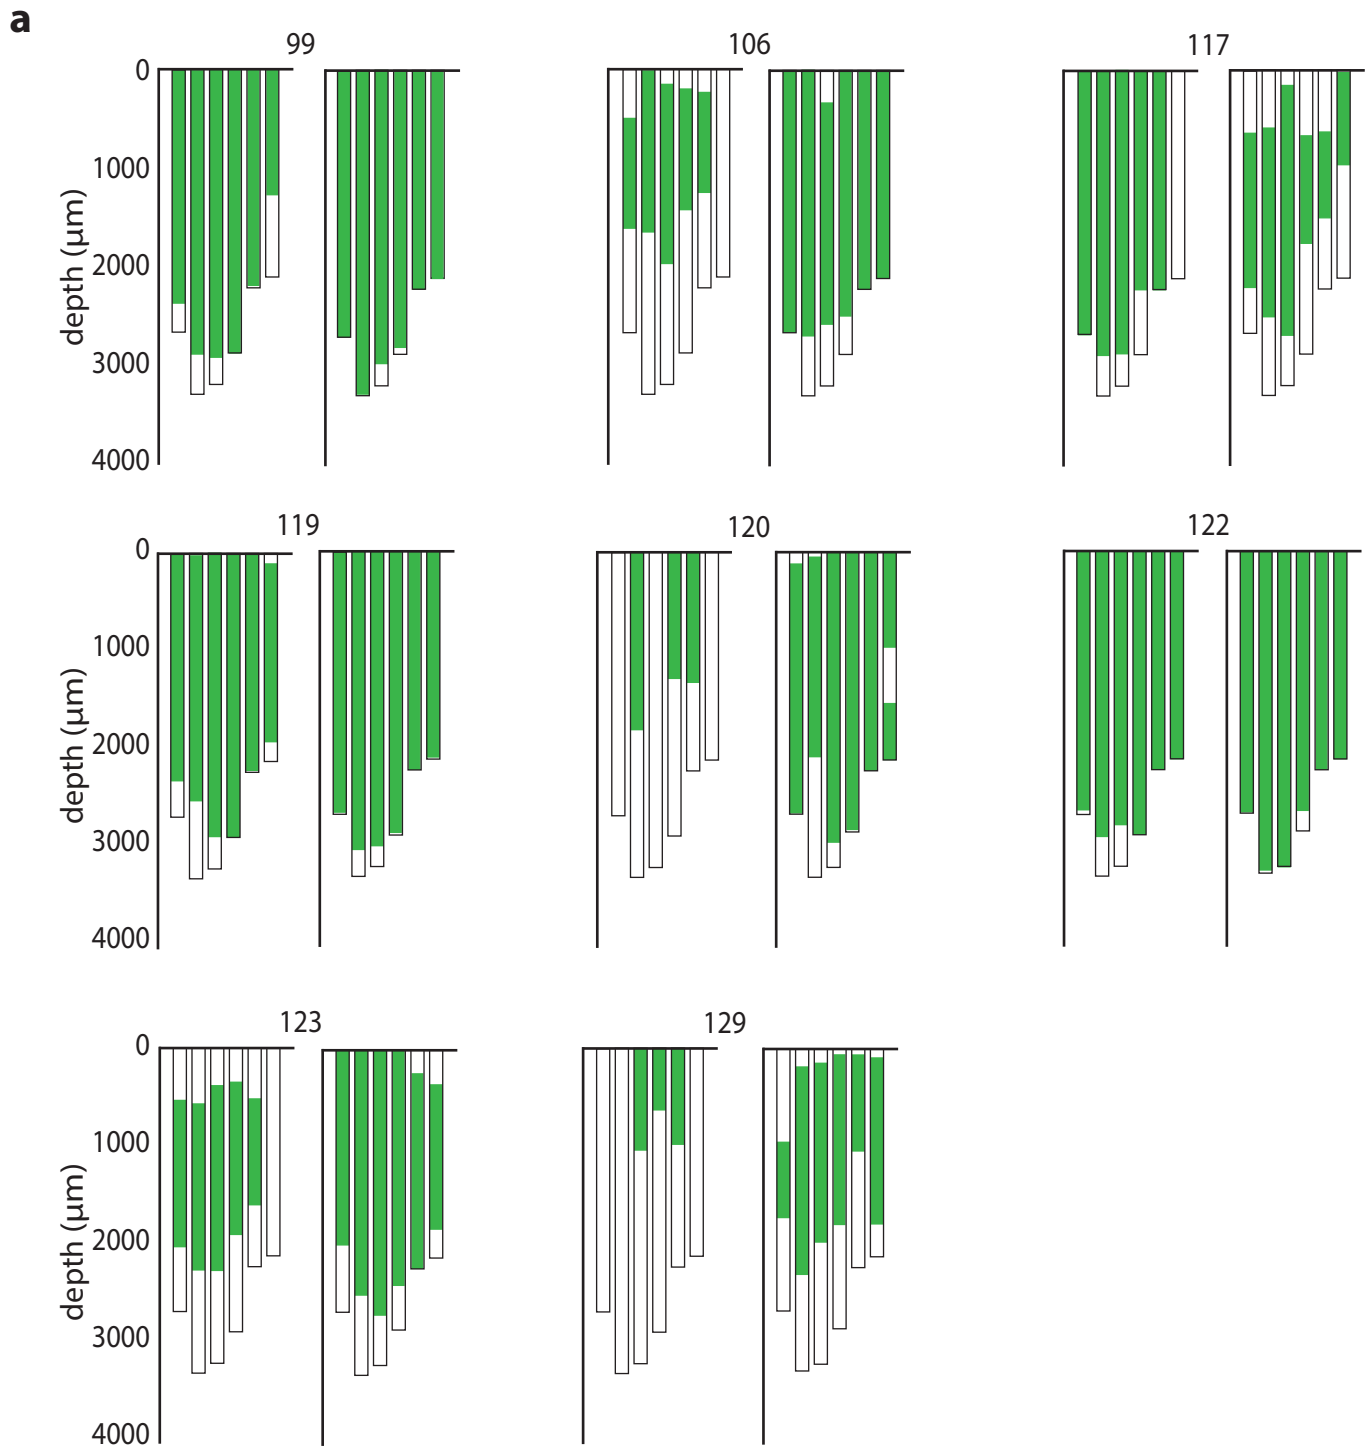

## Injected Floxed HCN1 Knockout (iCre-KO)

**a**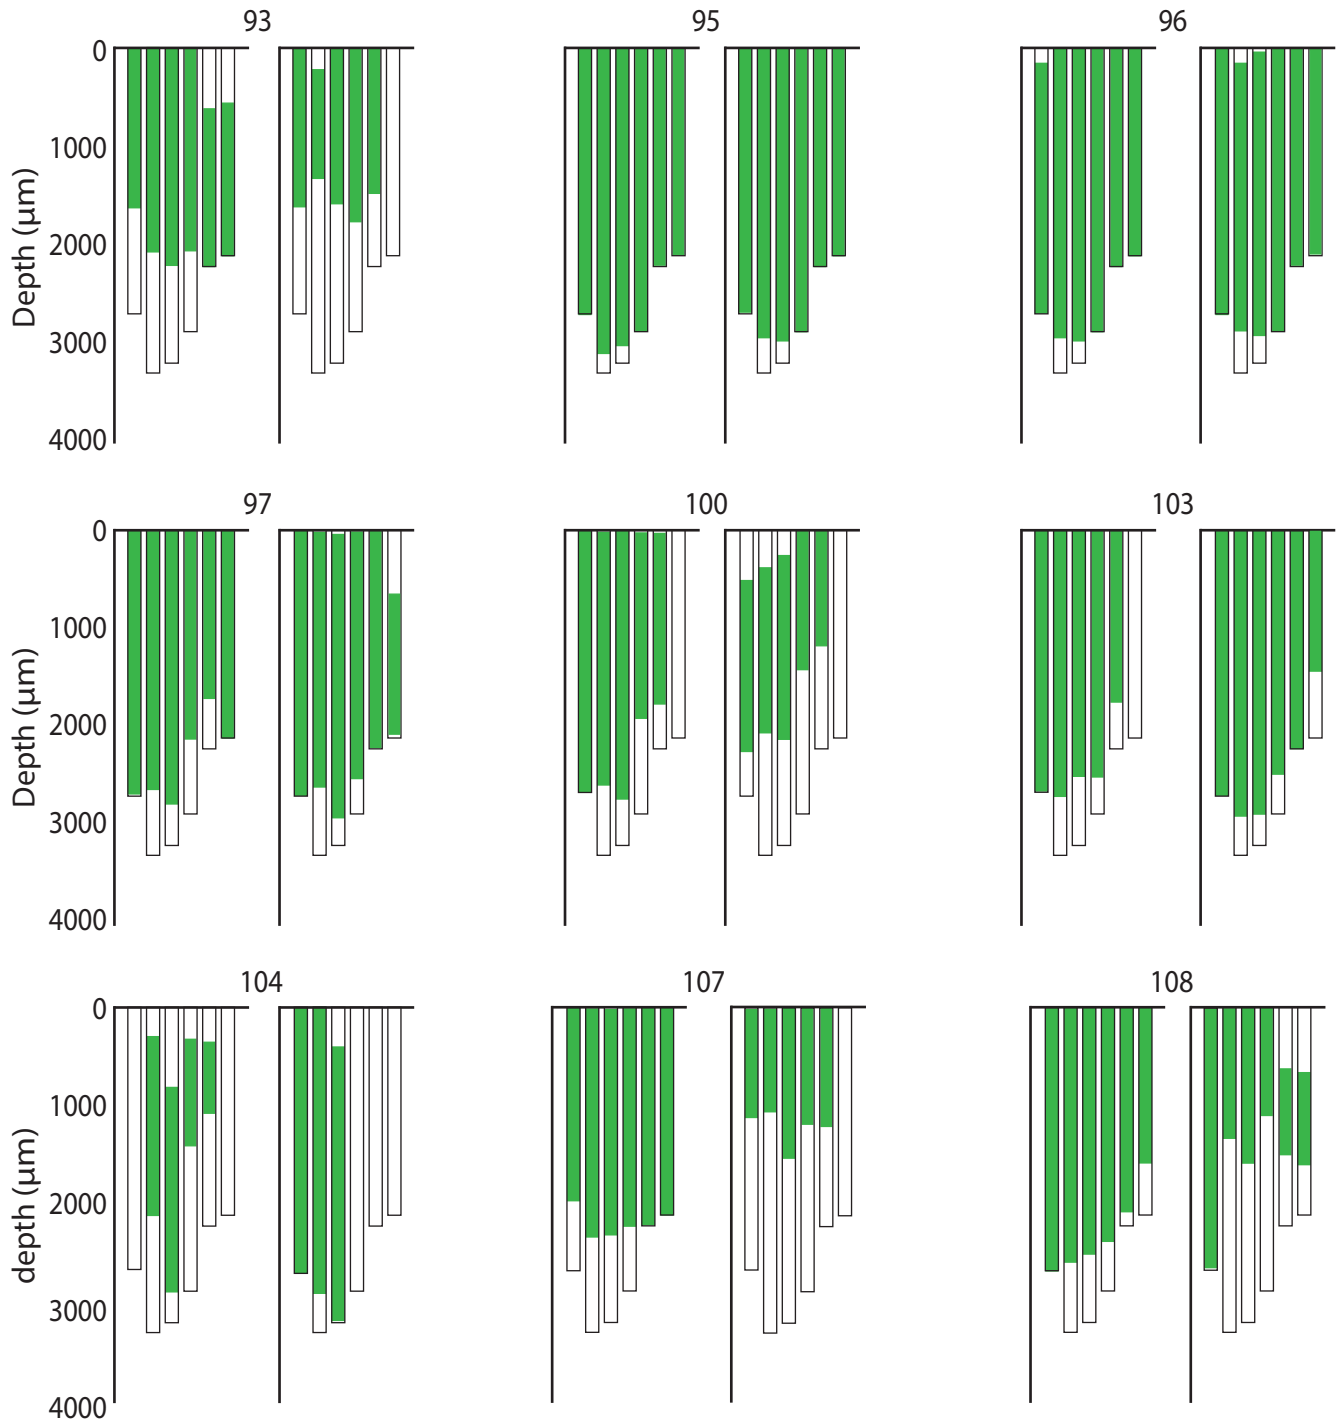

## Injected Floxed HCN1 Knockout (iCre-KO)

**a**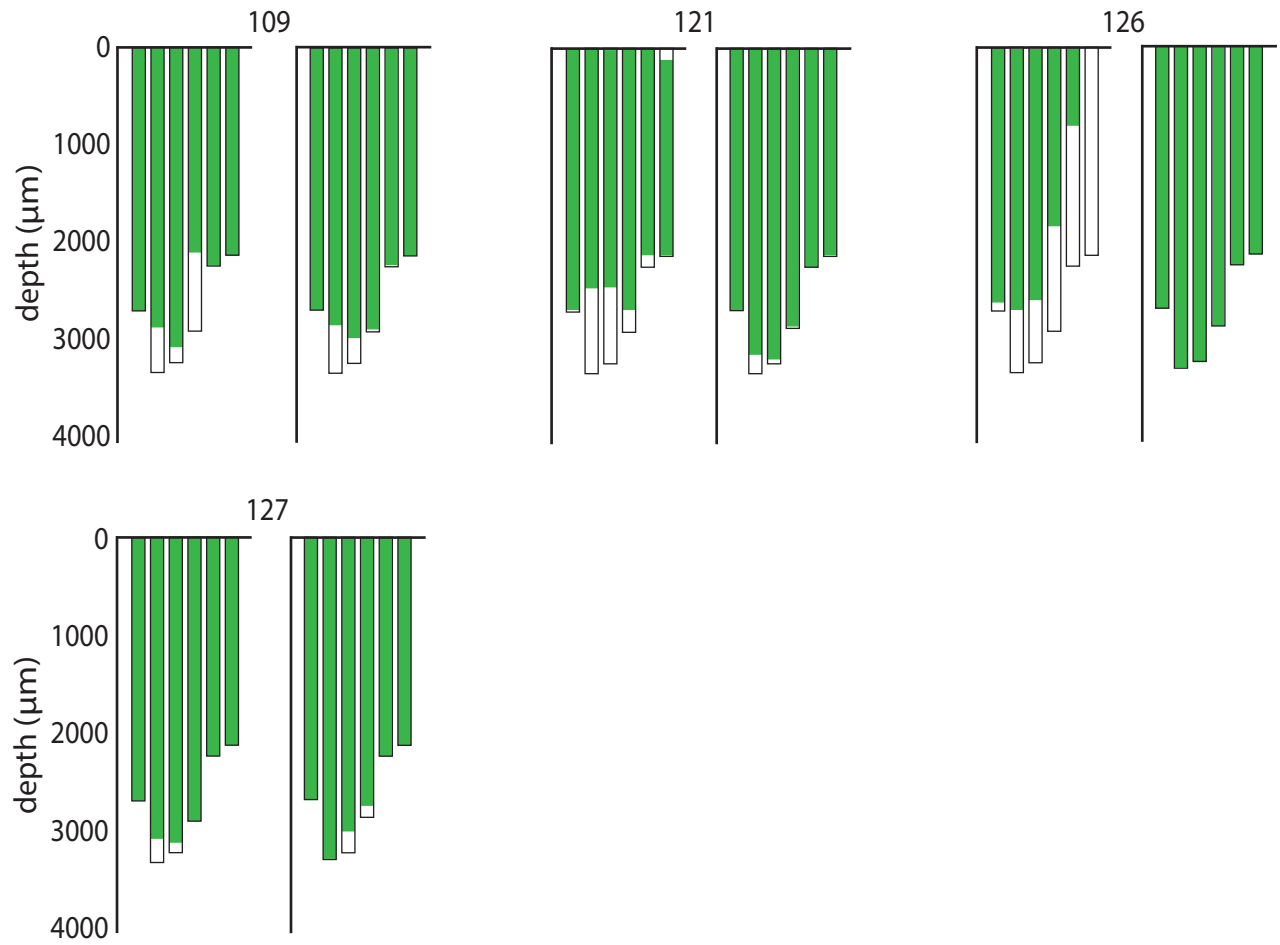**b**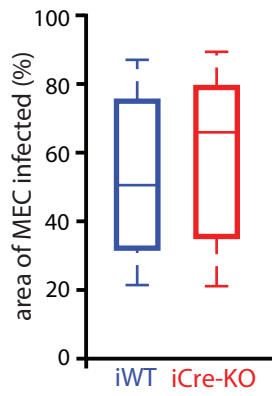**c**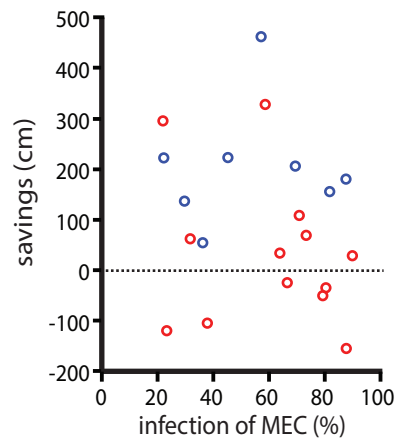

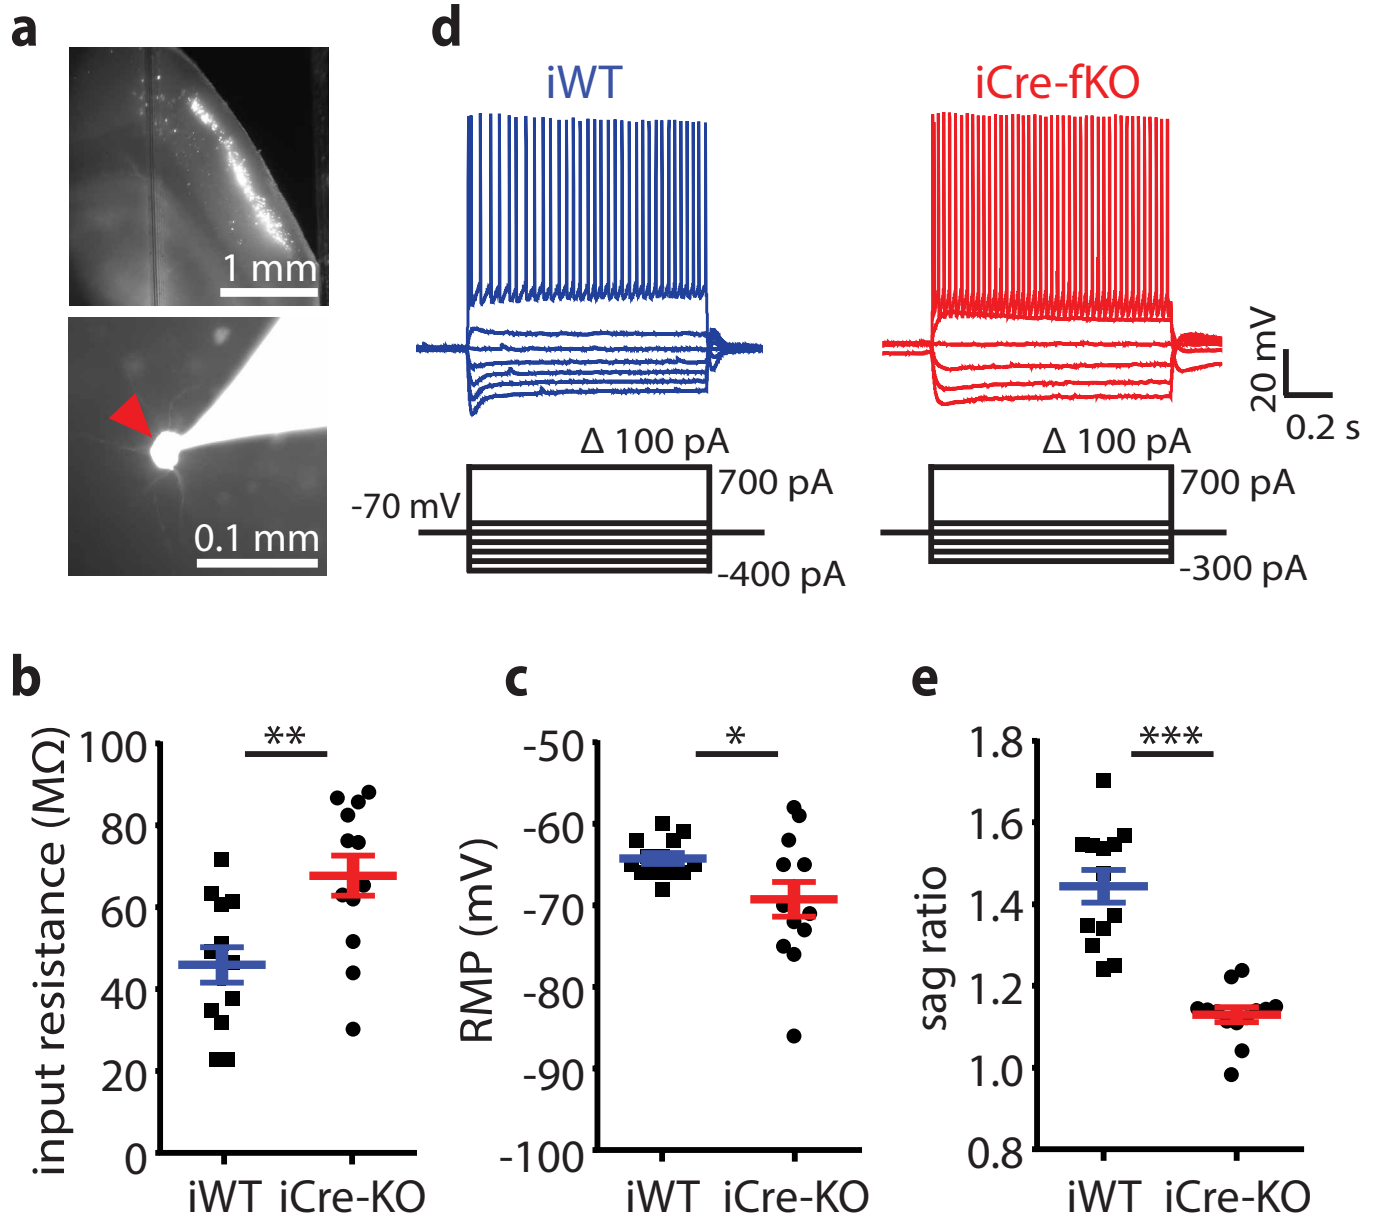



**a****iWT**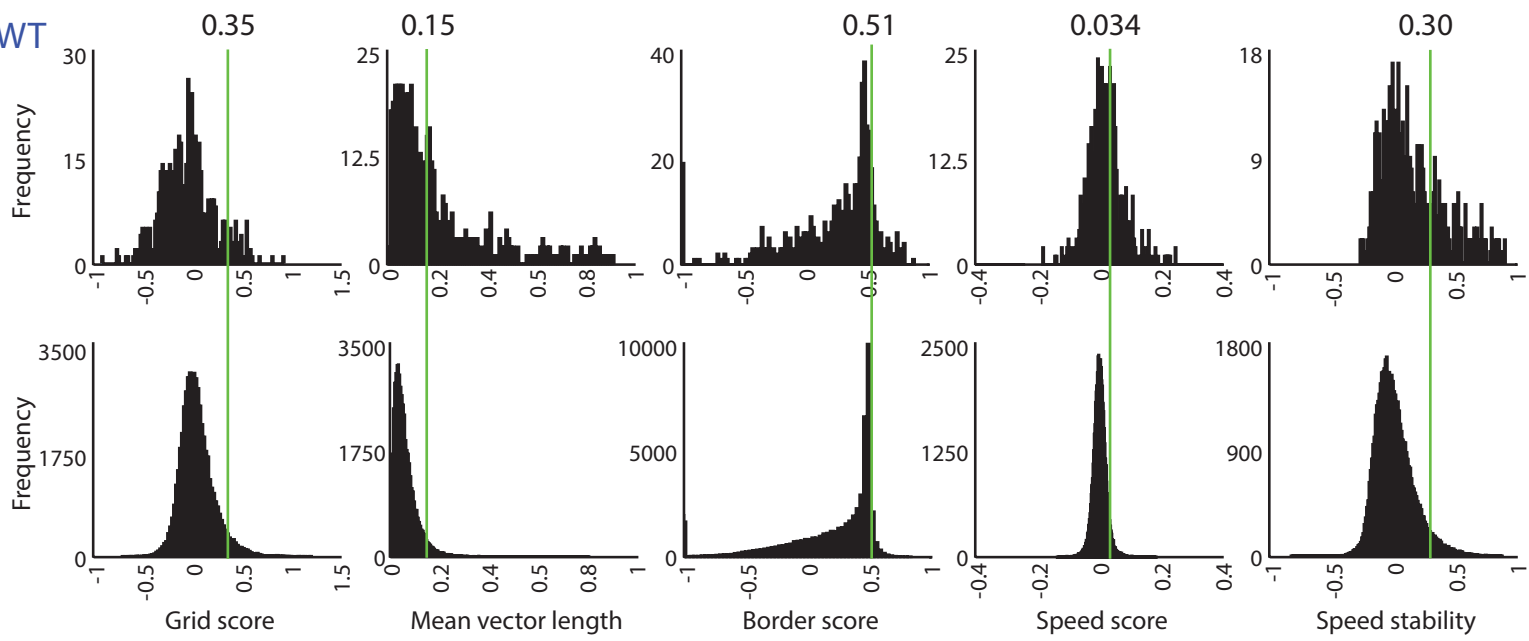**iCre-KO**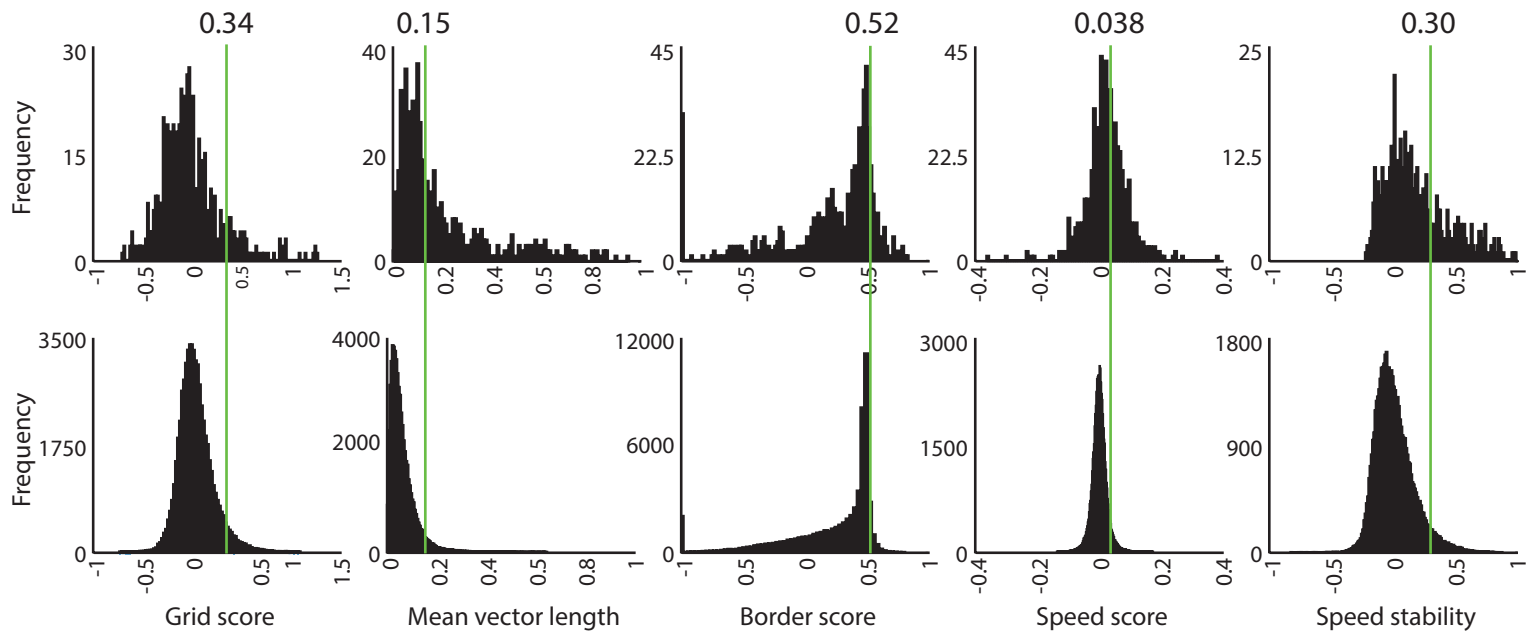**b****iWT**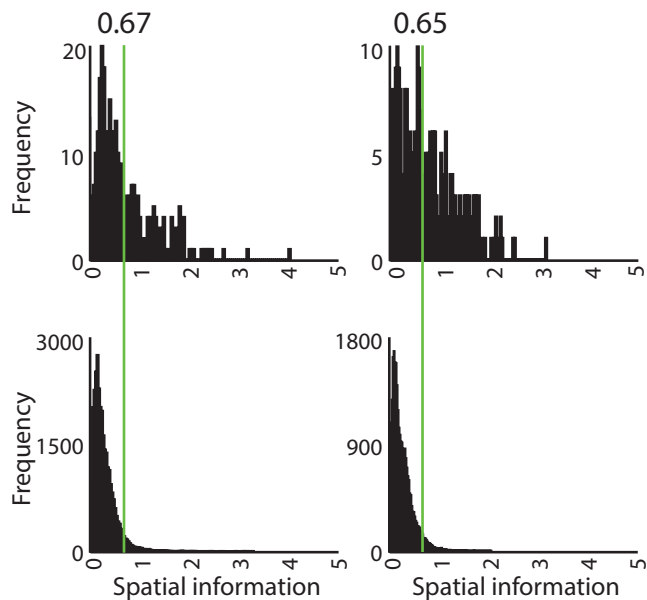**iCre-KO**

**a**

iWT

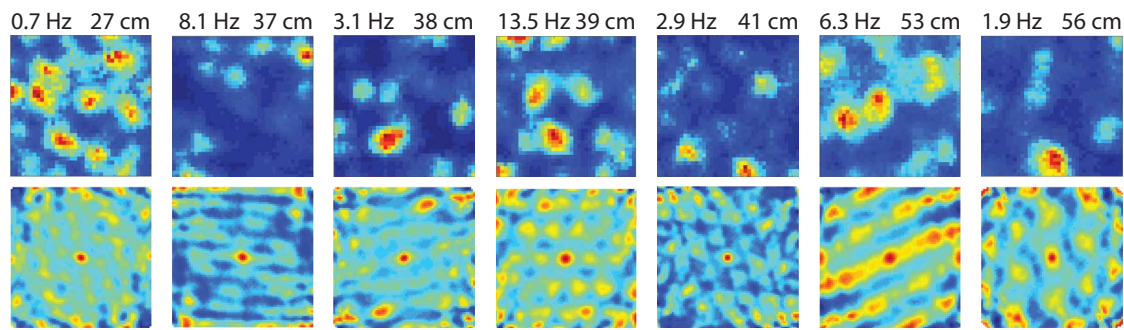

iCre-KO

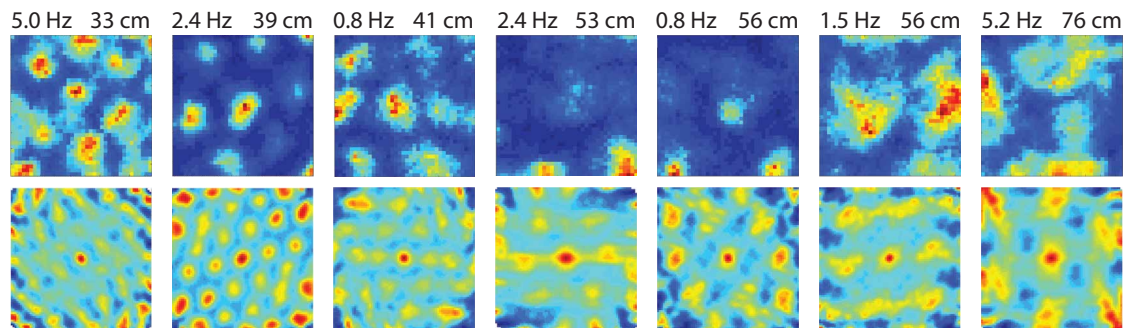**b**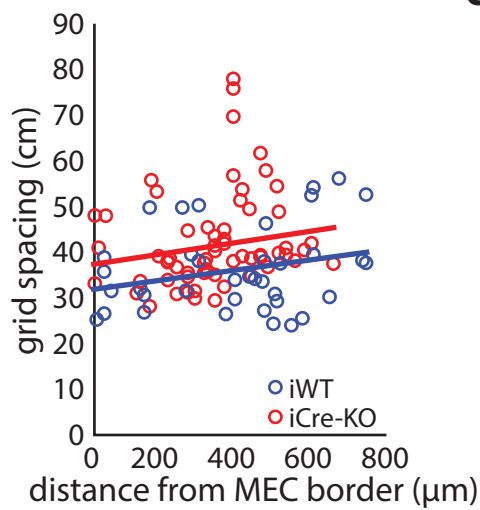**c**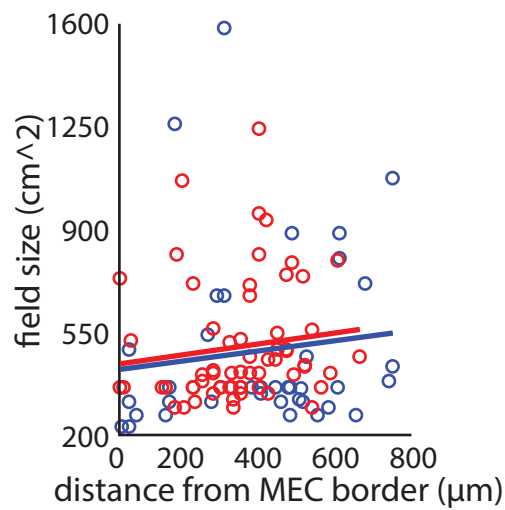**d**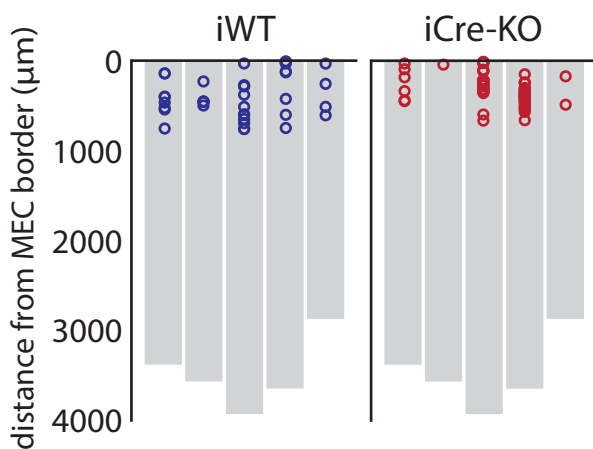**e**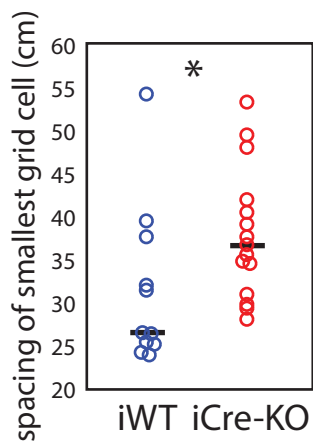**f**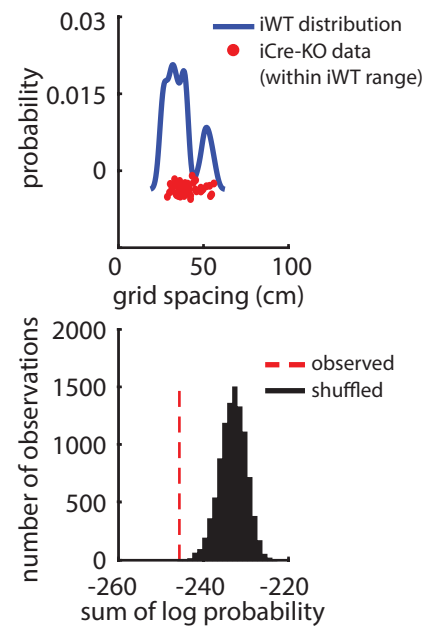

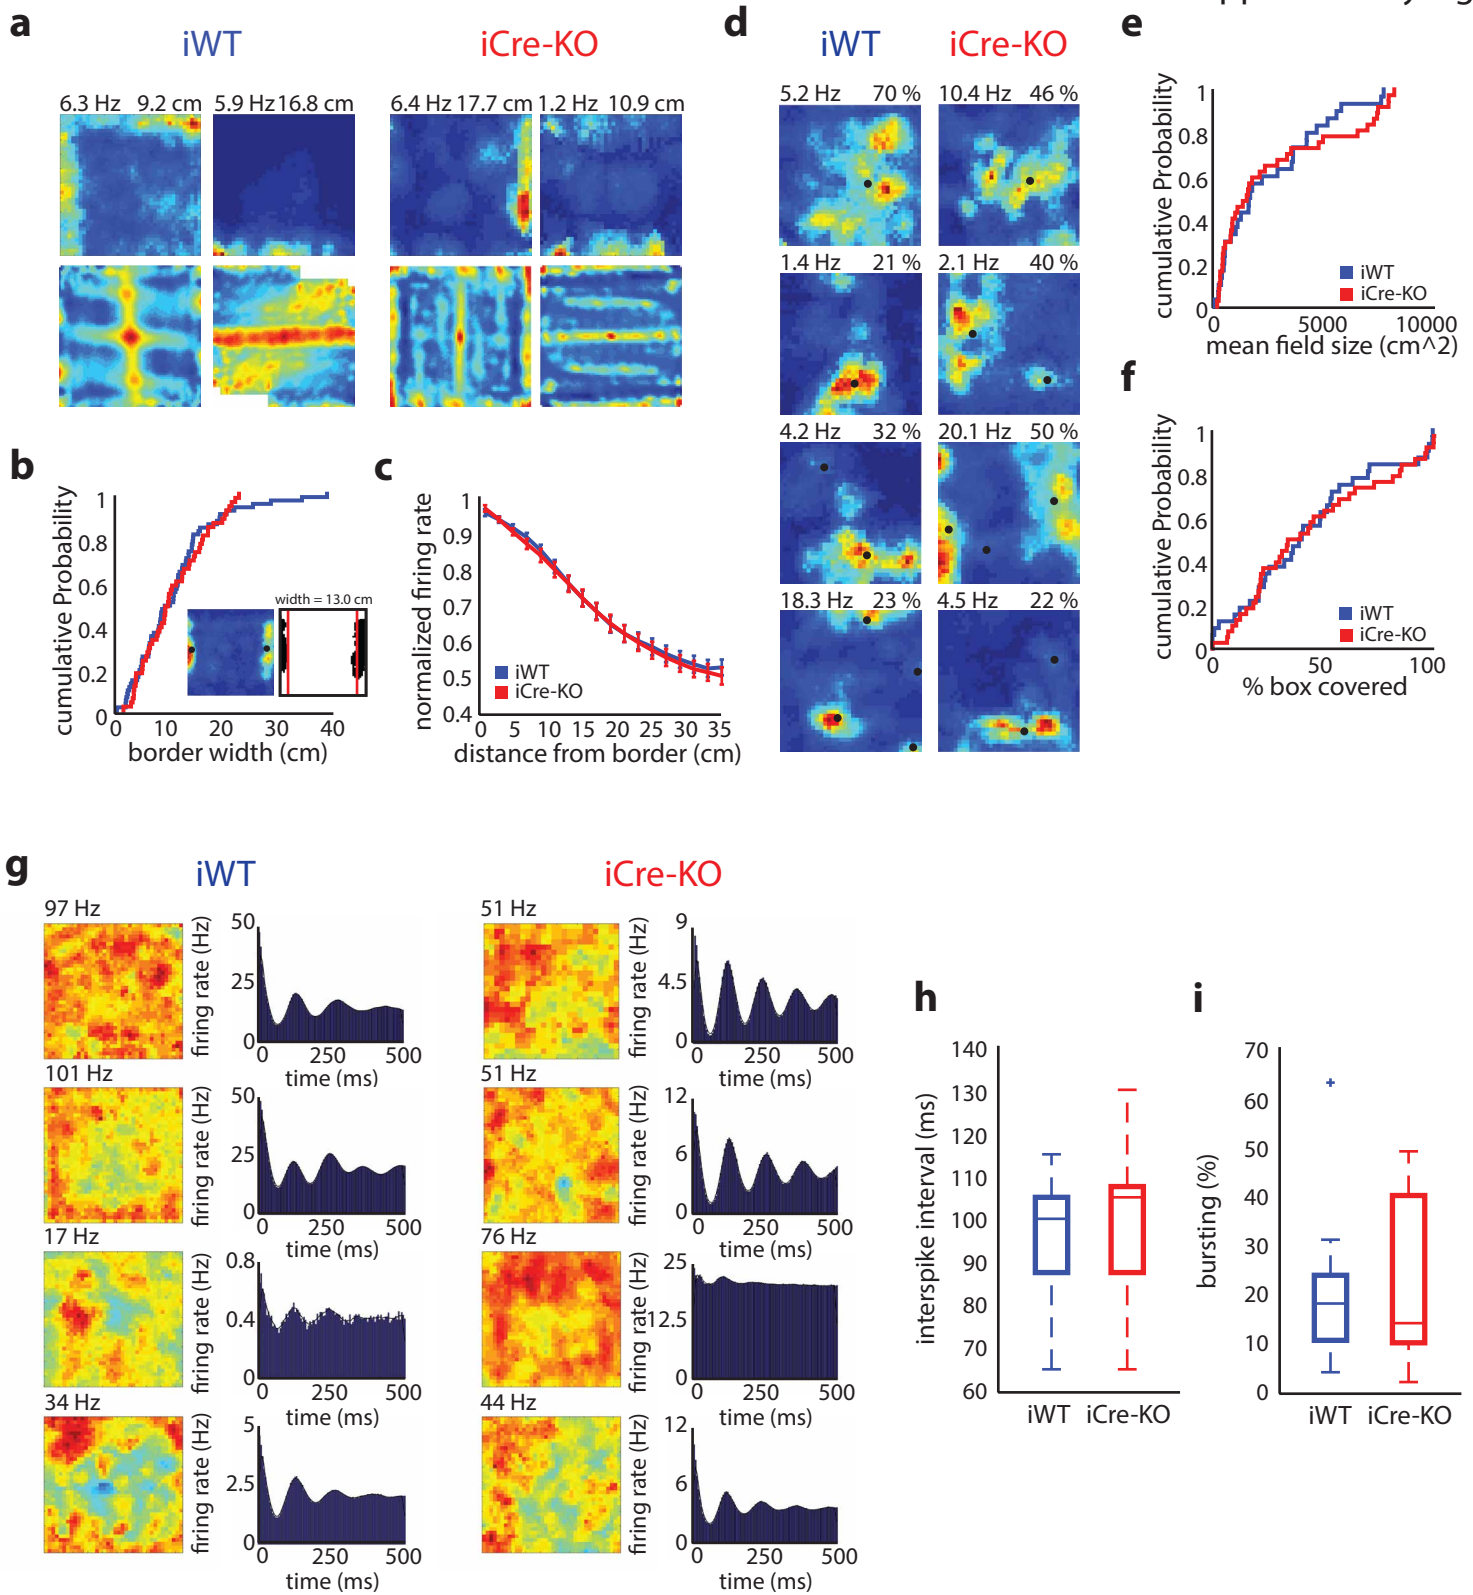

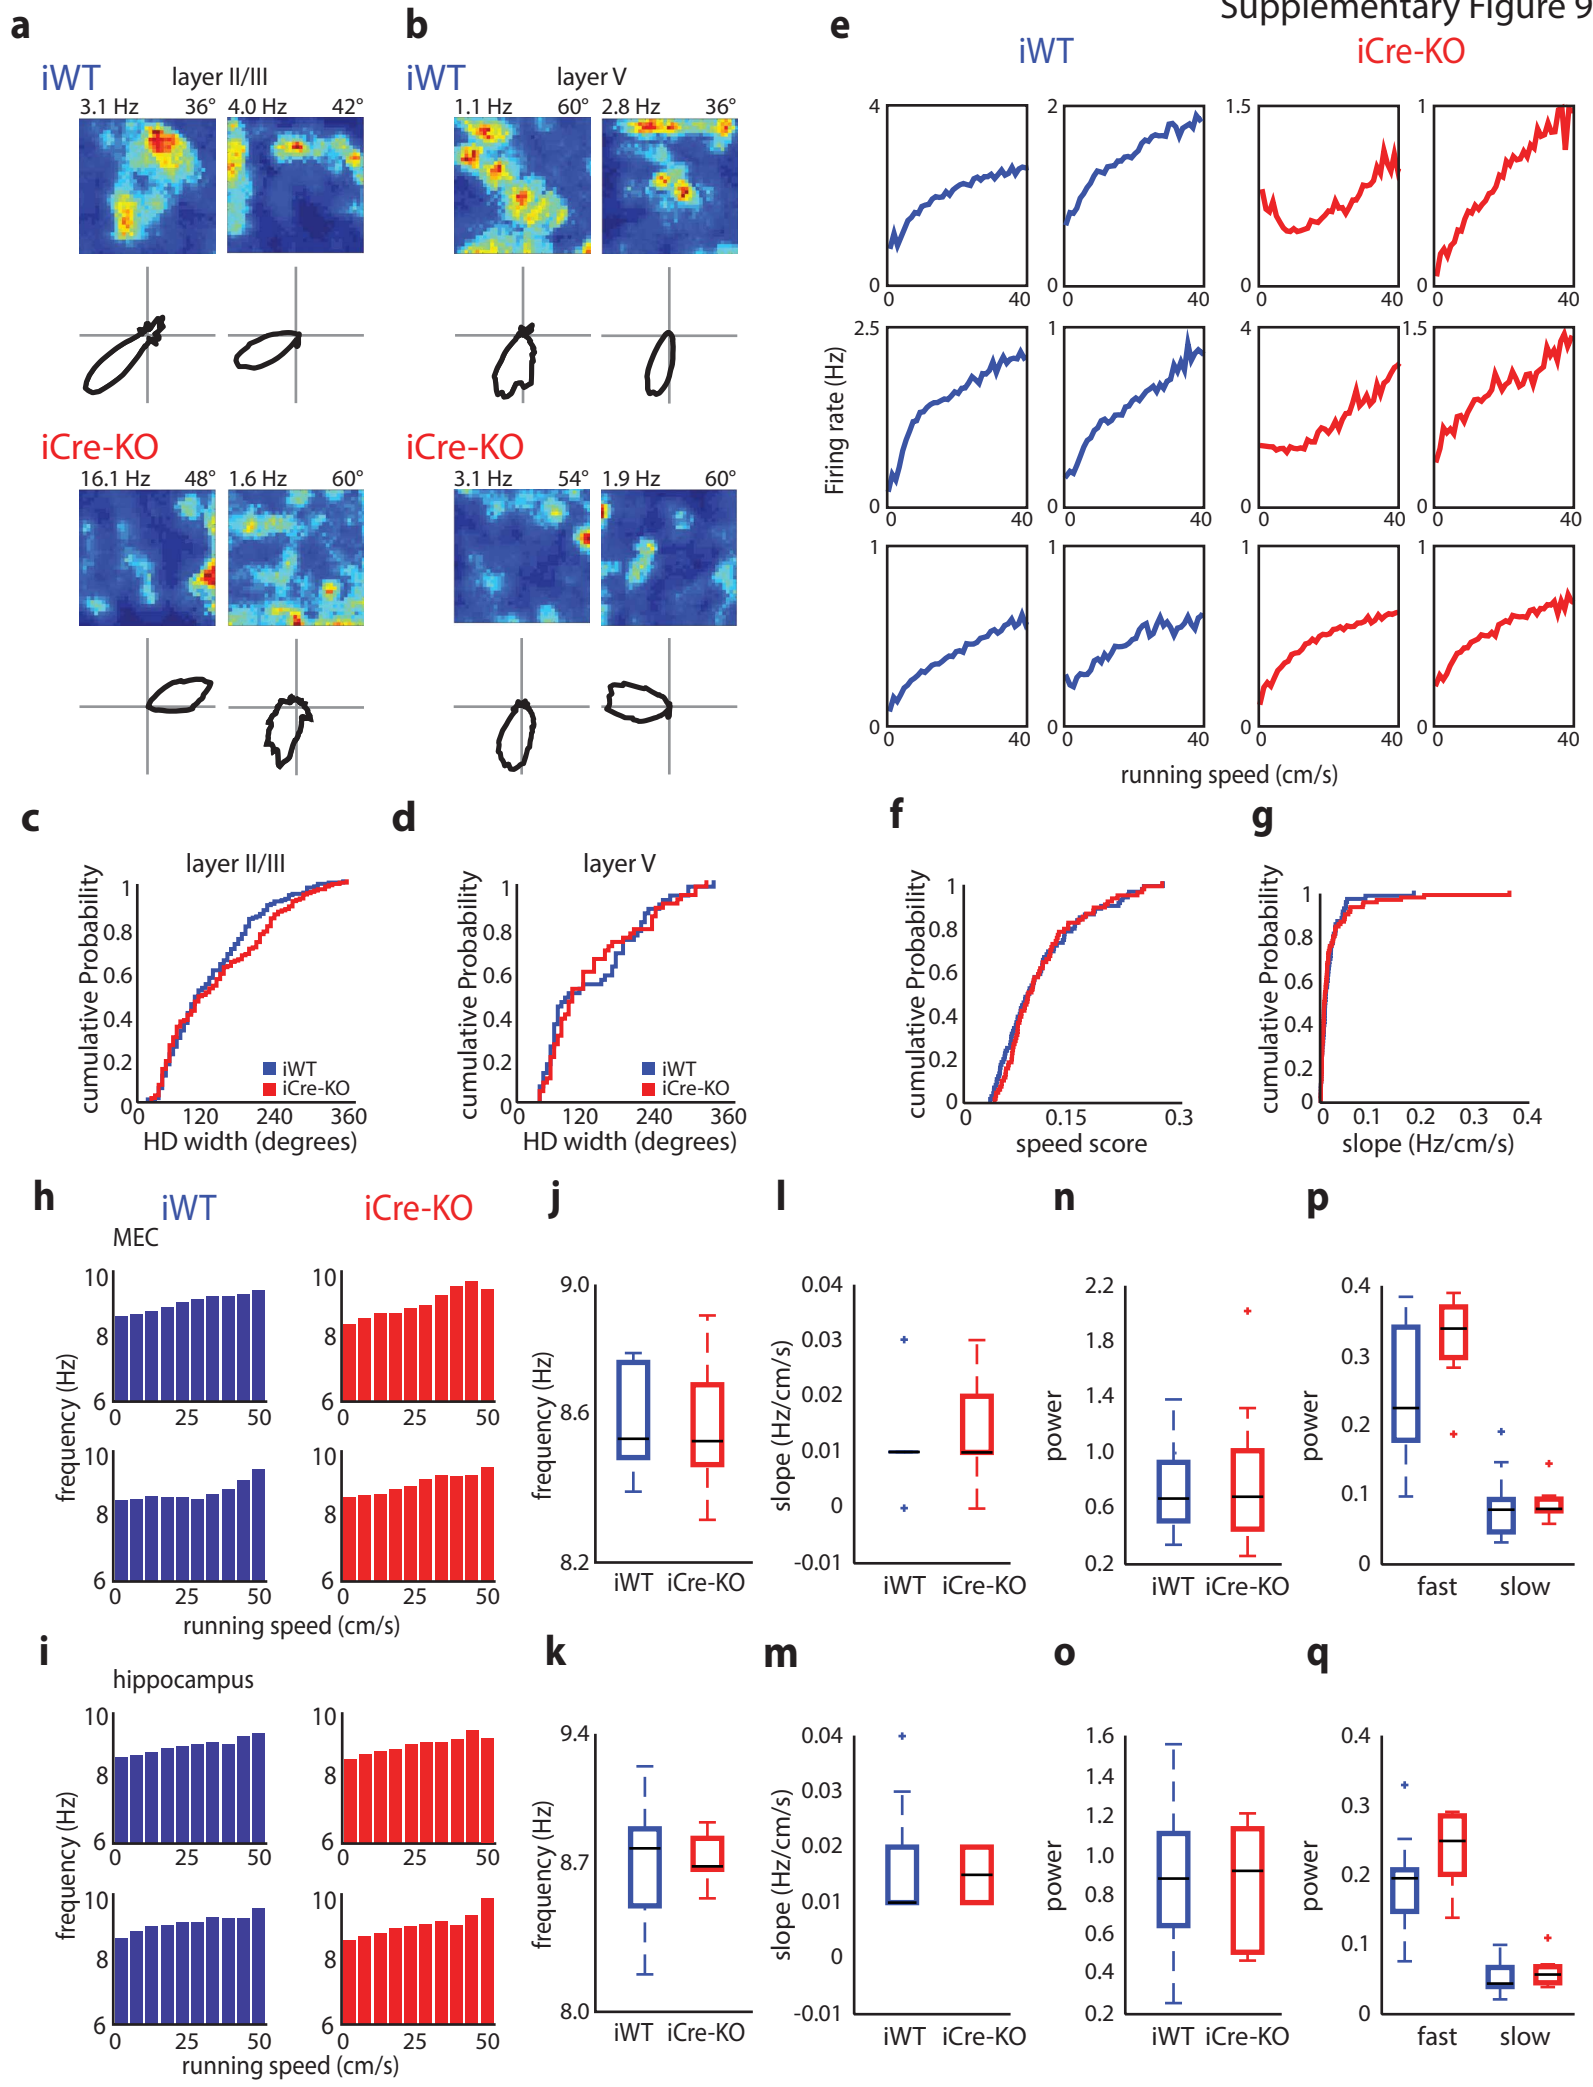

**a**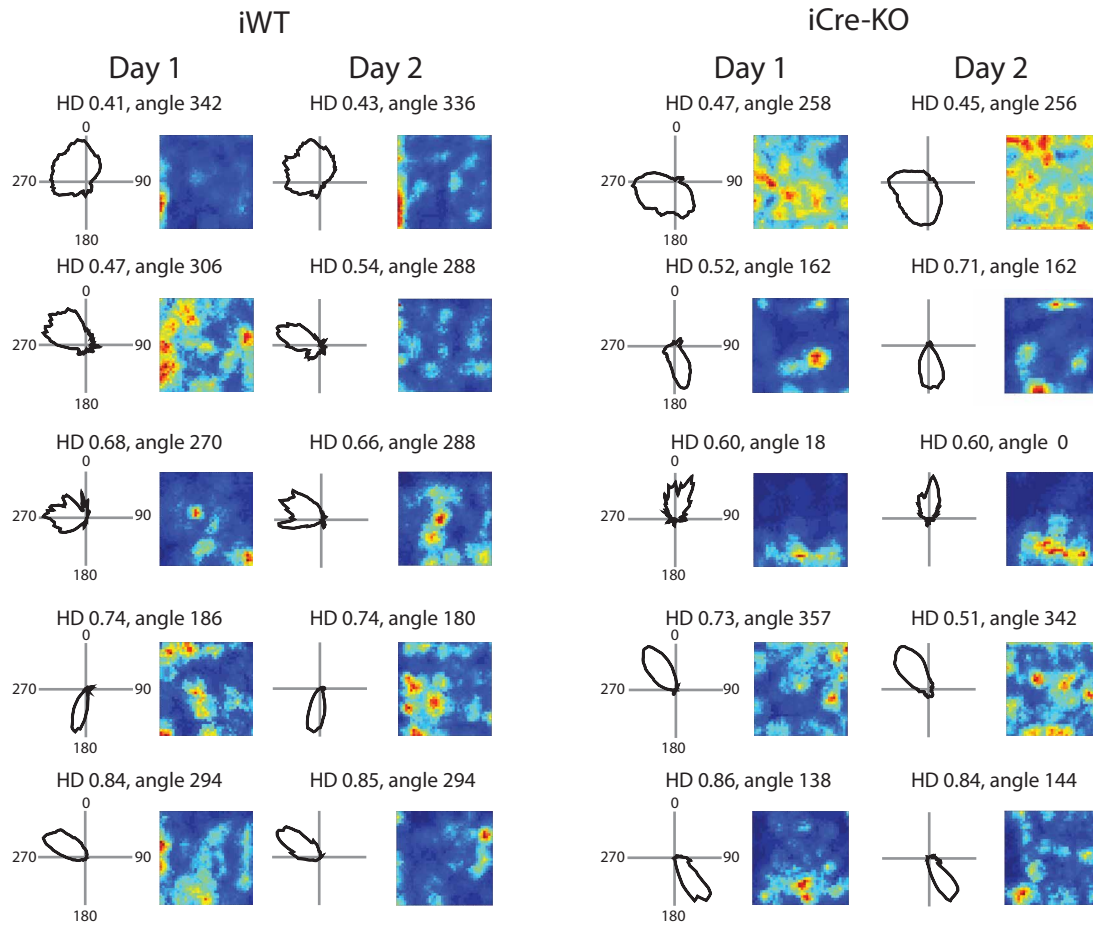**b**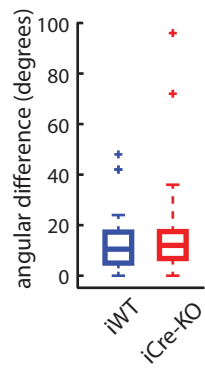**c**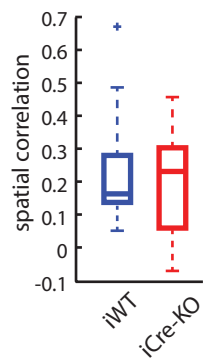

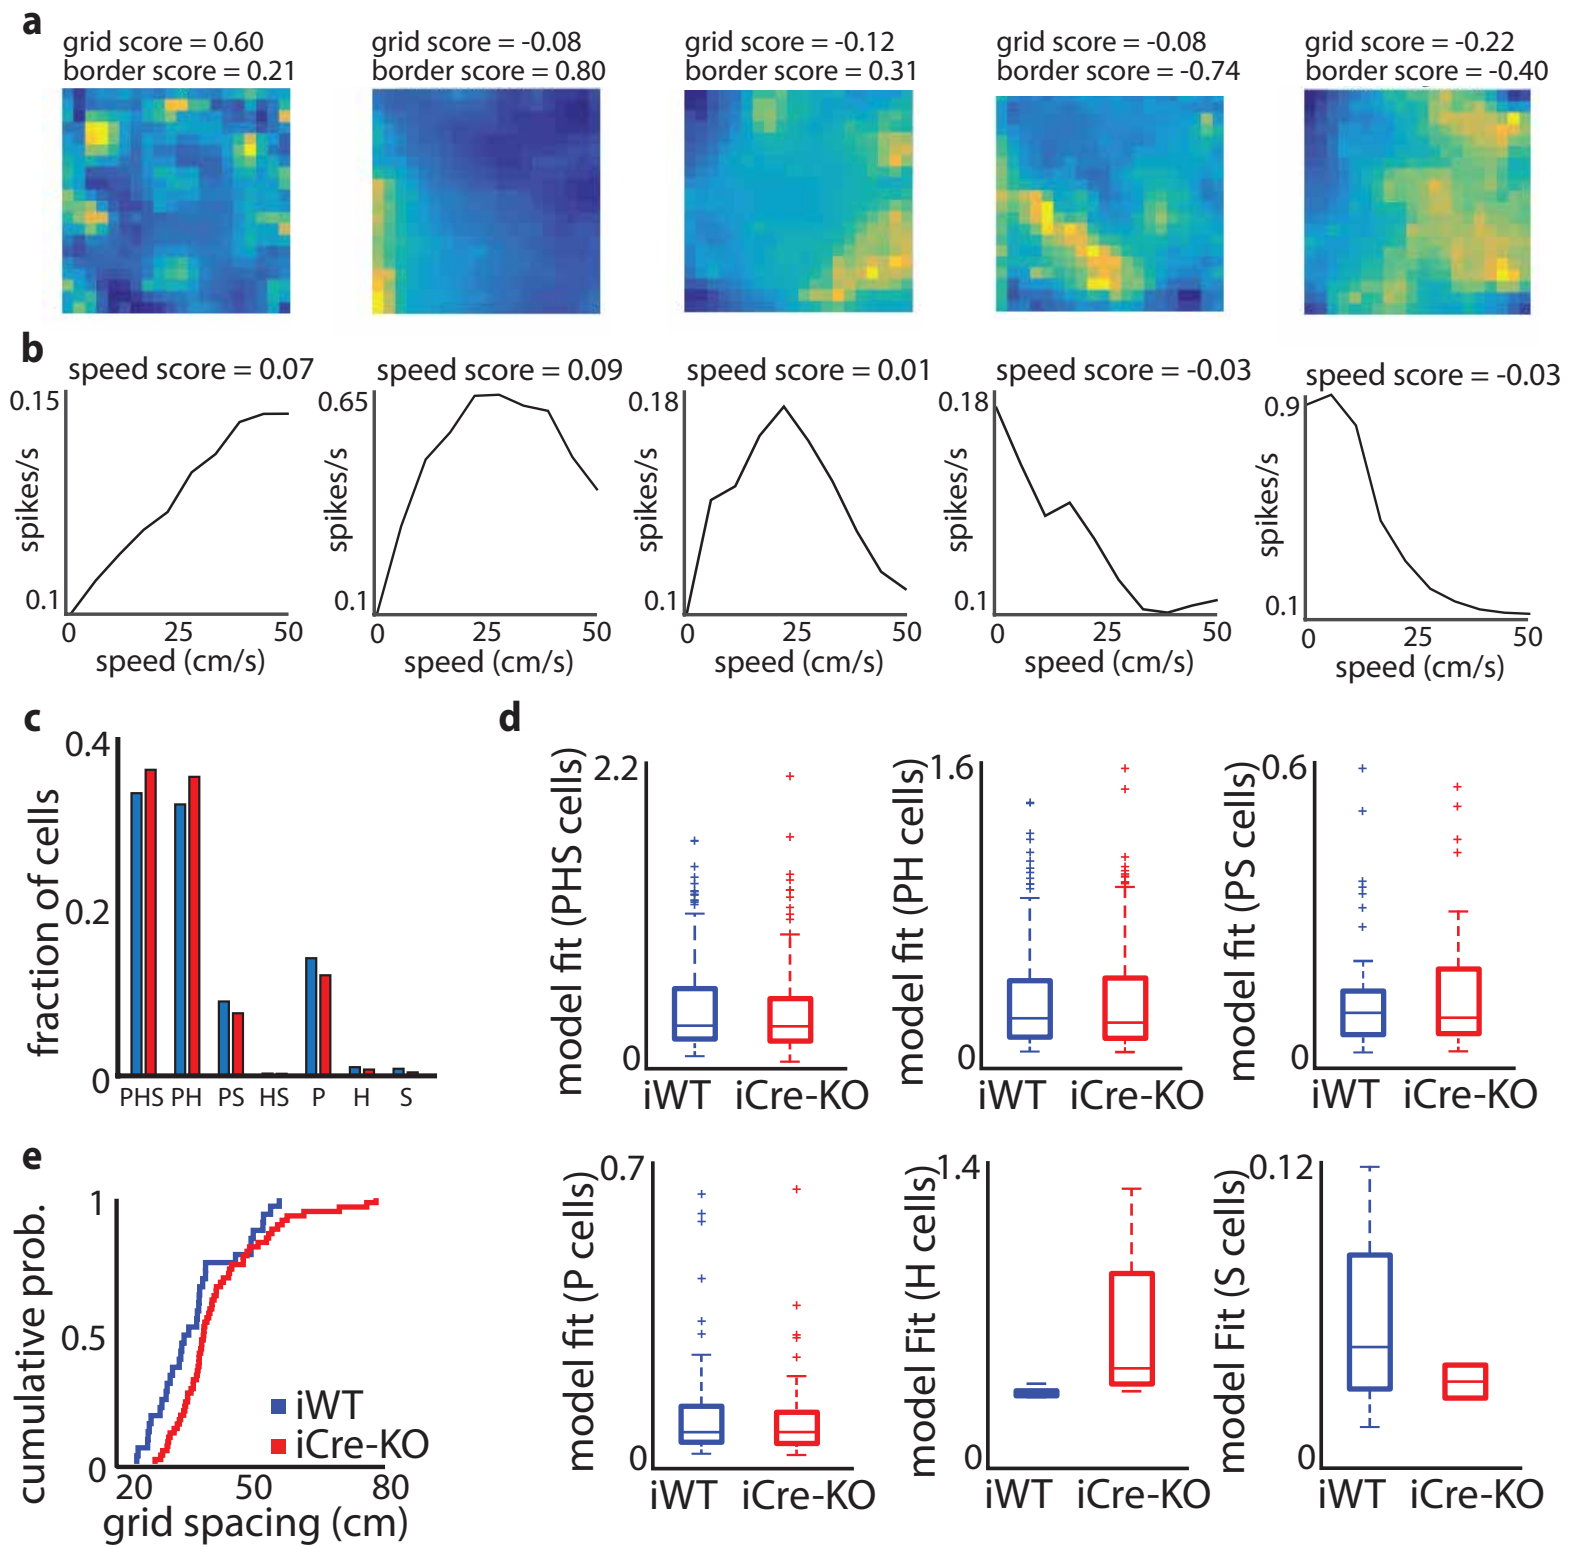

**a**

iWT

iCre-KO

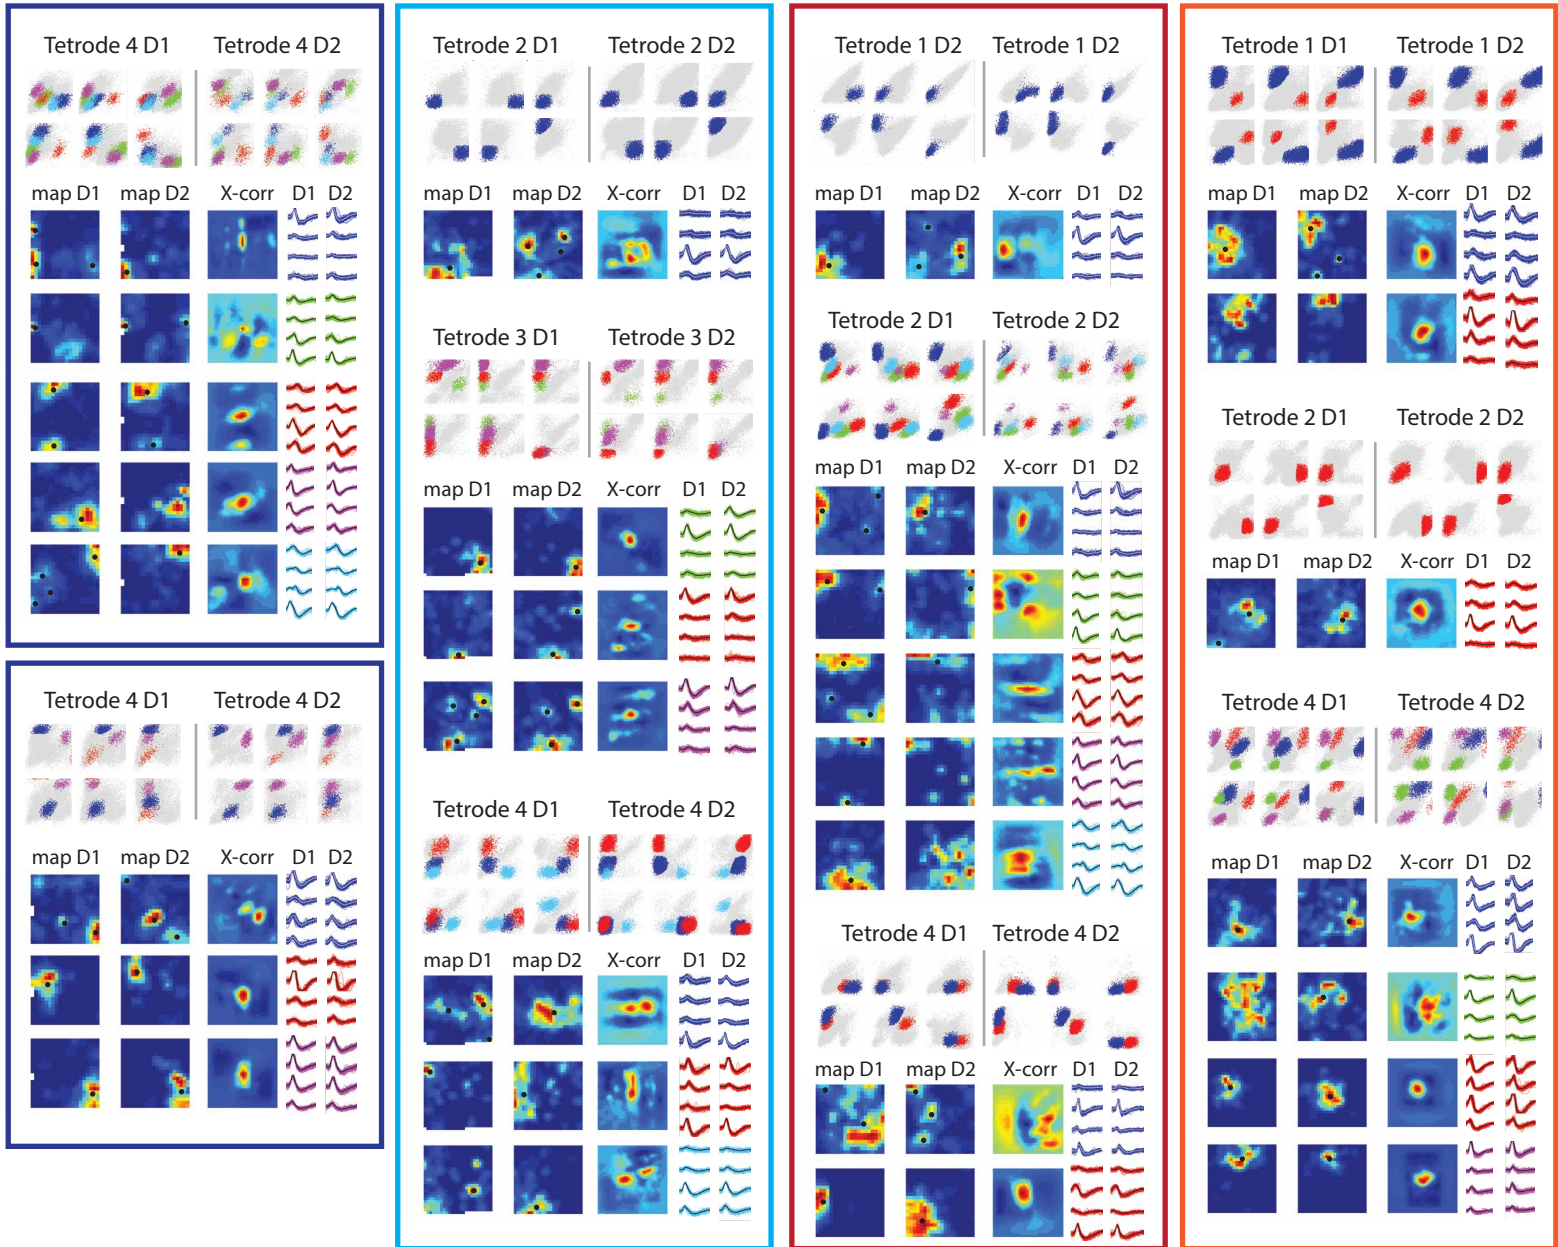**b**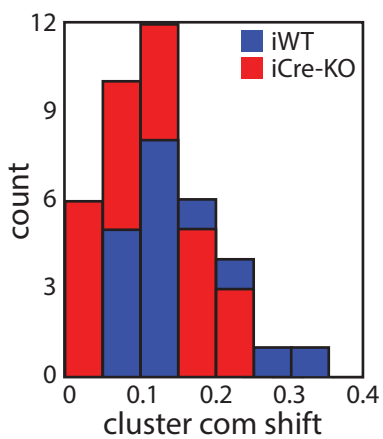**c**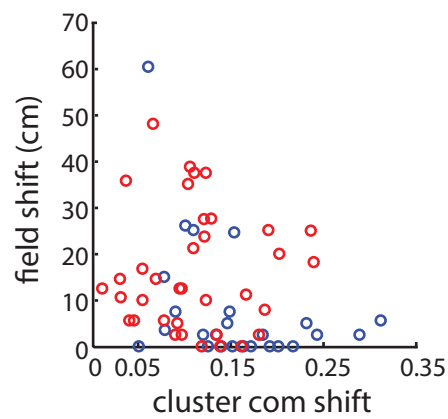

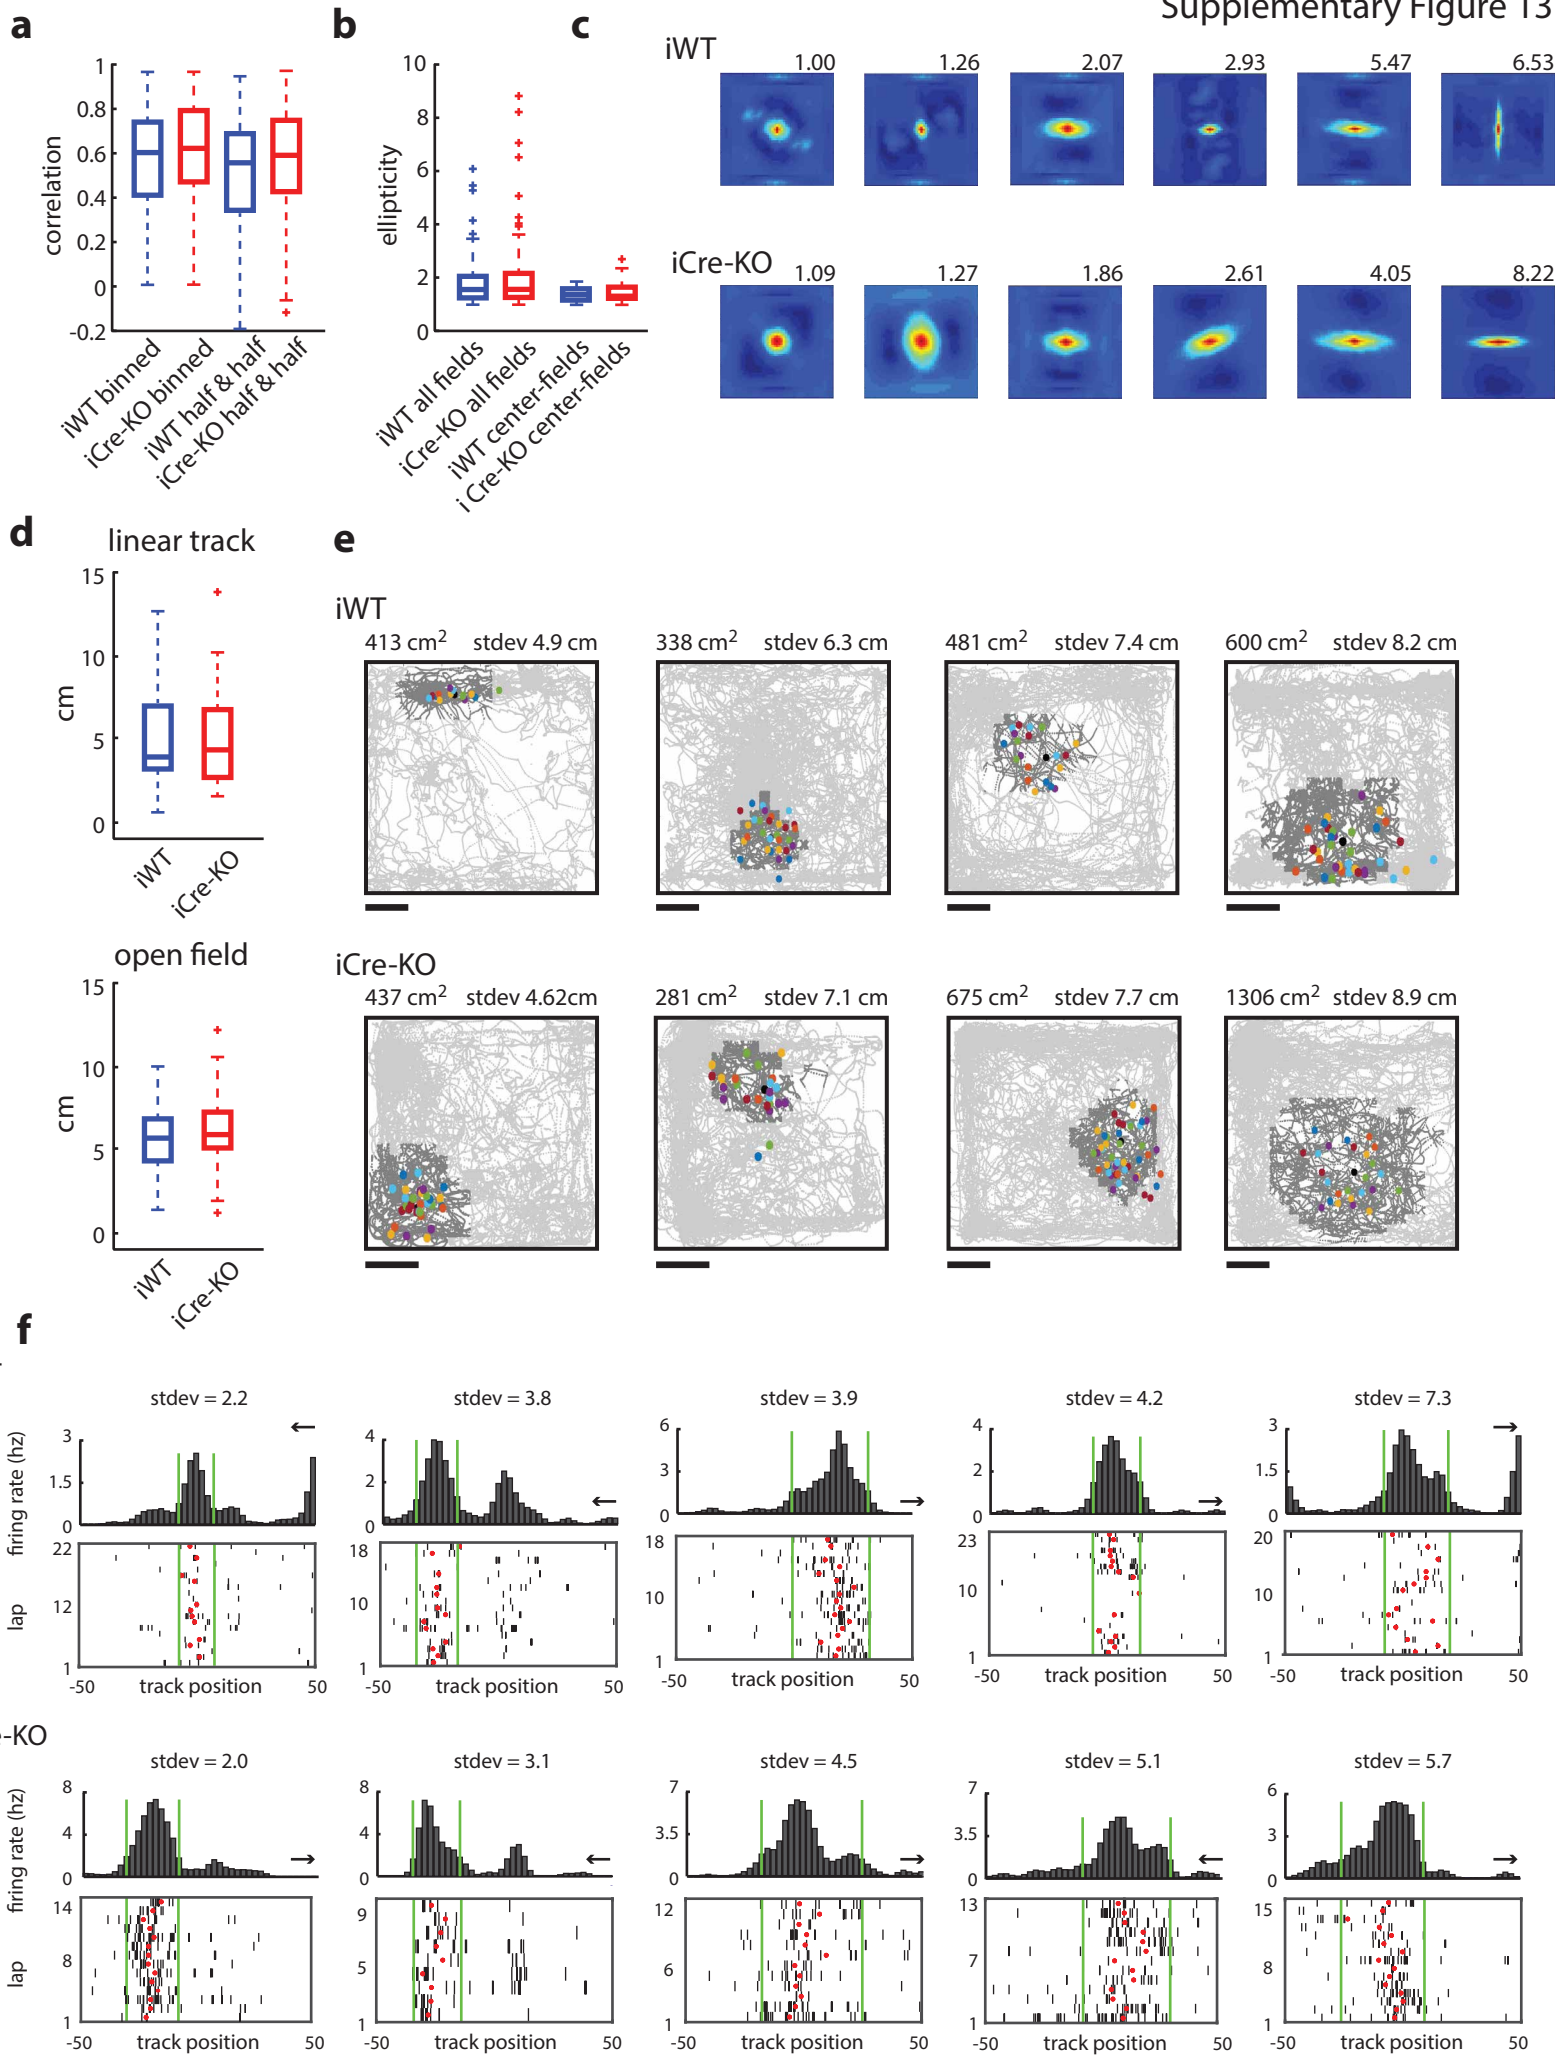



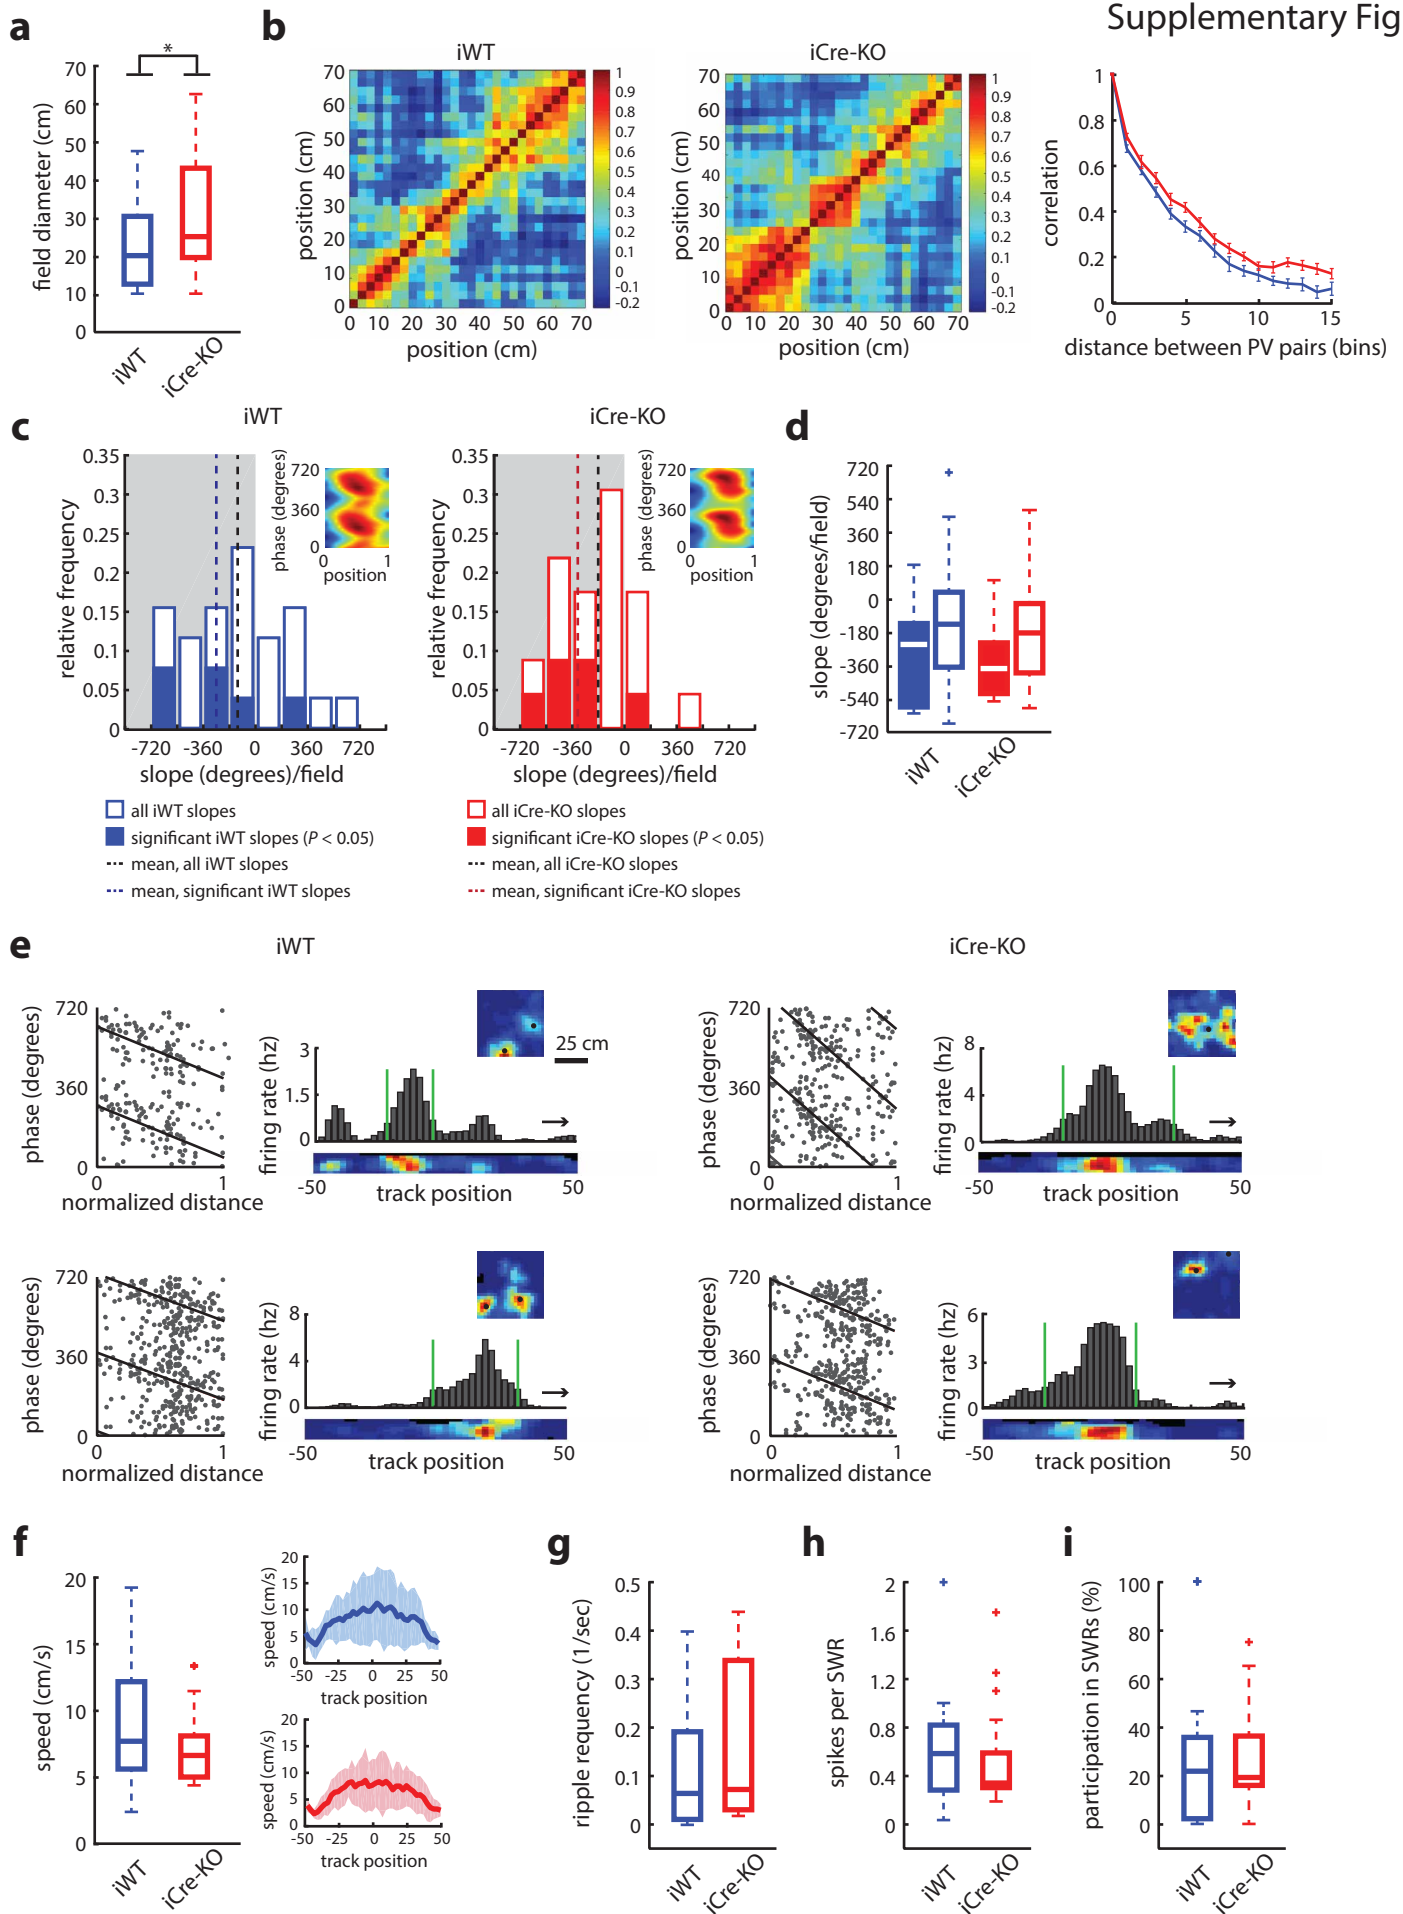

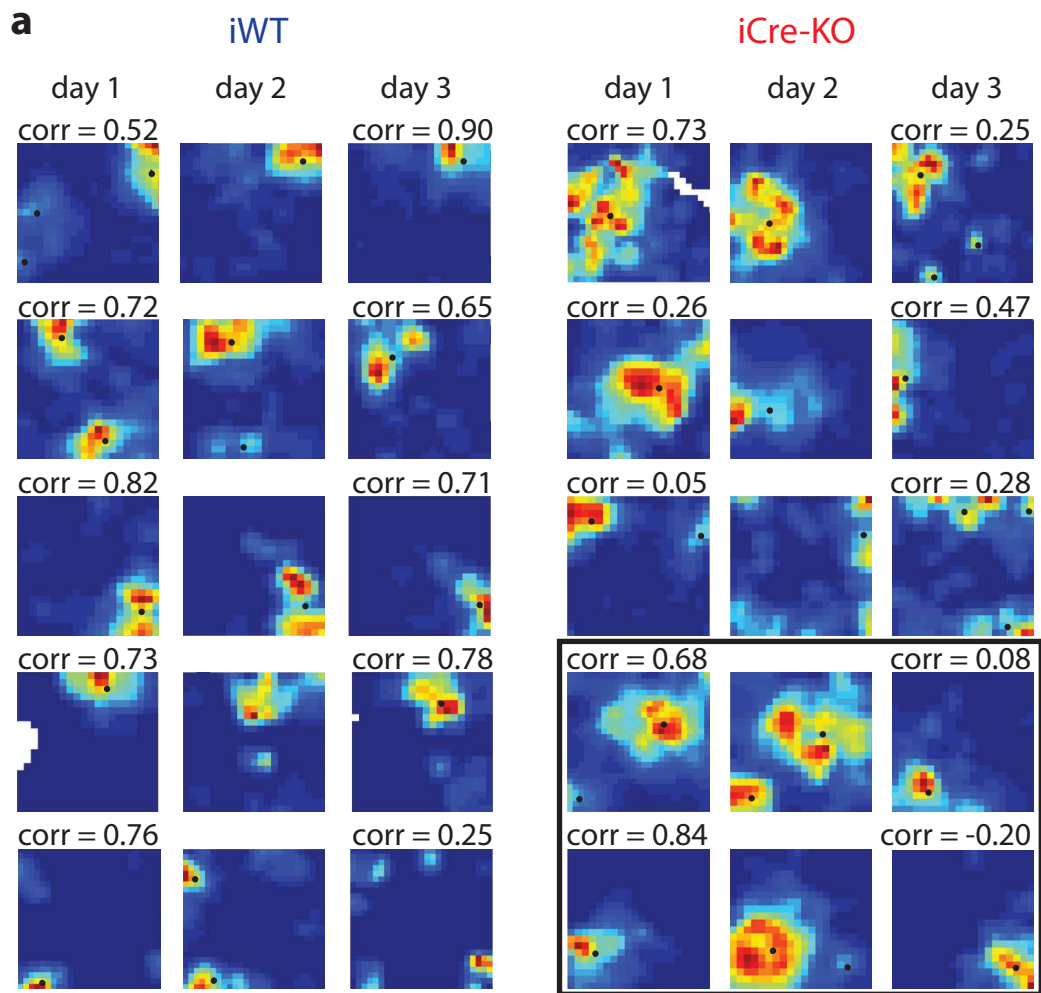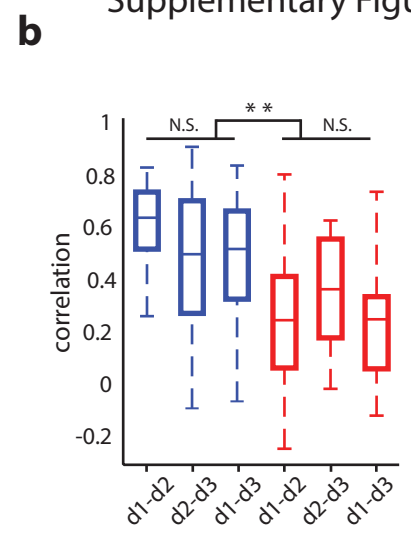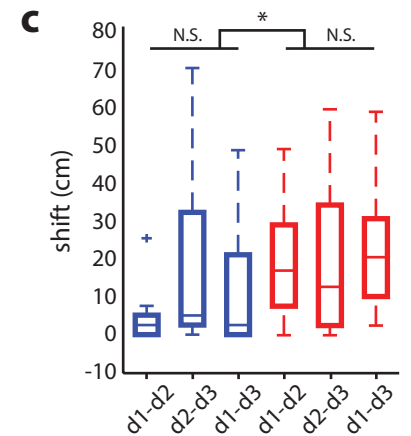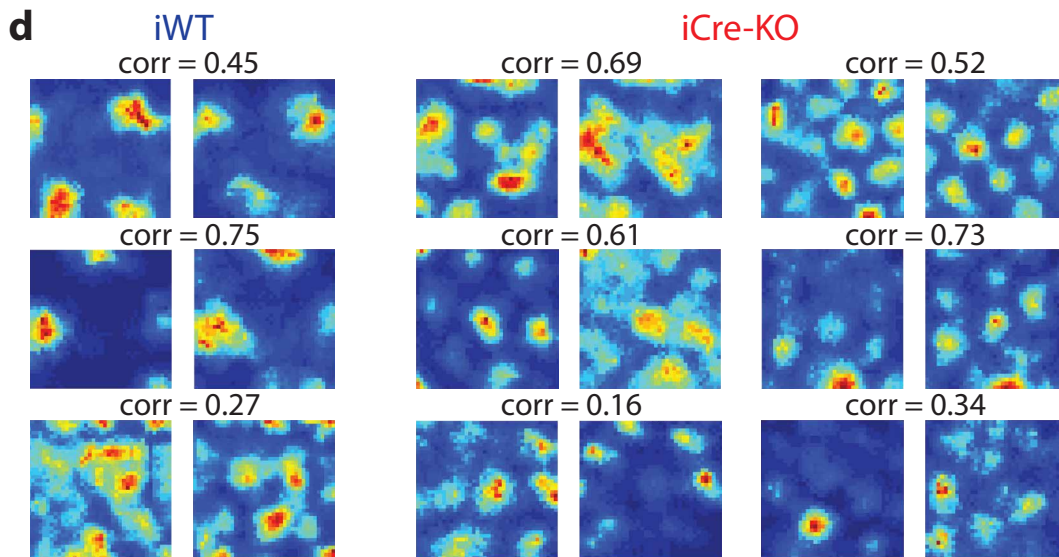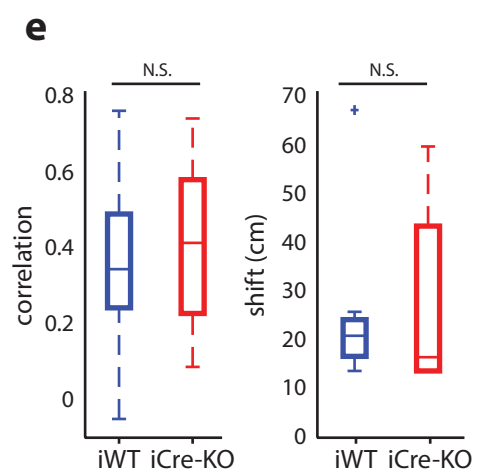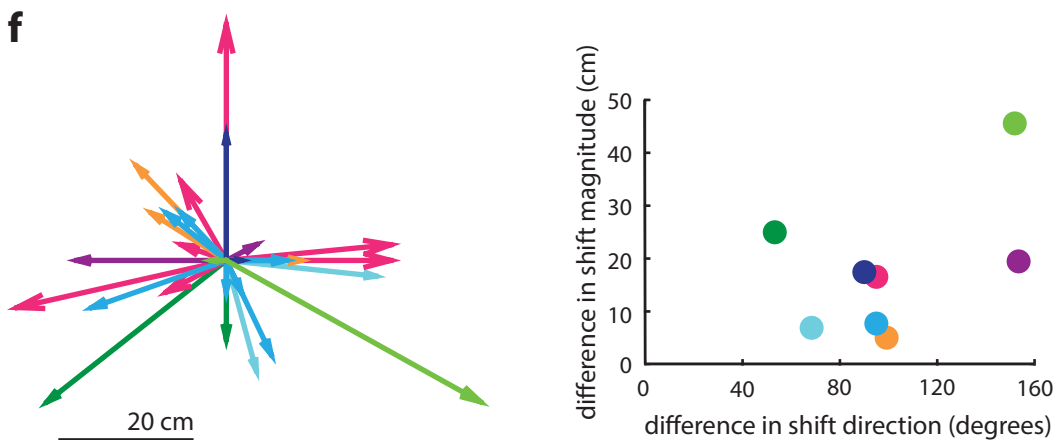

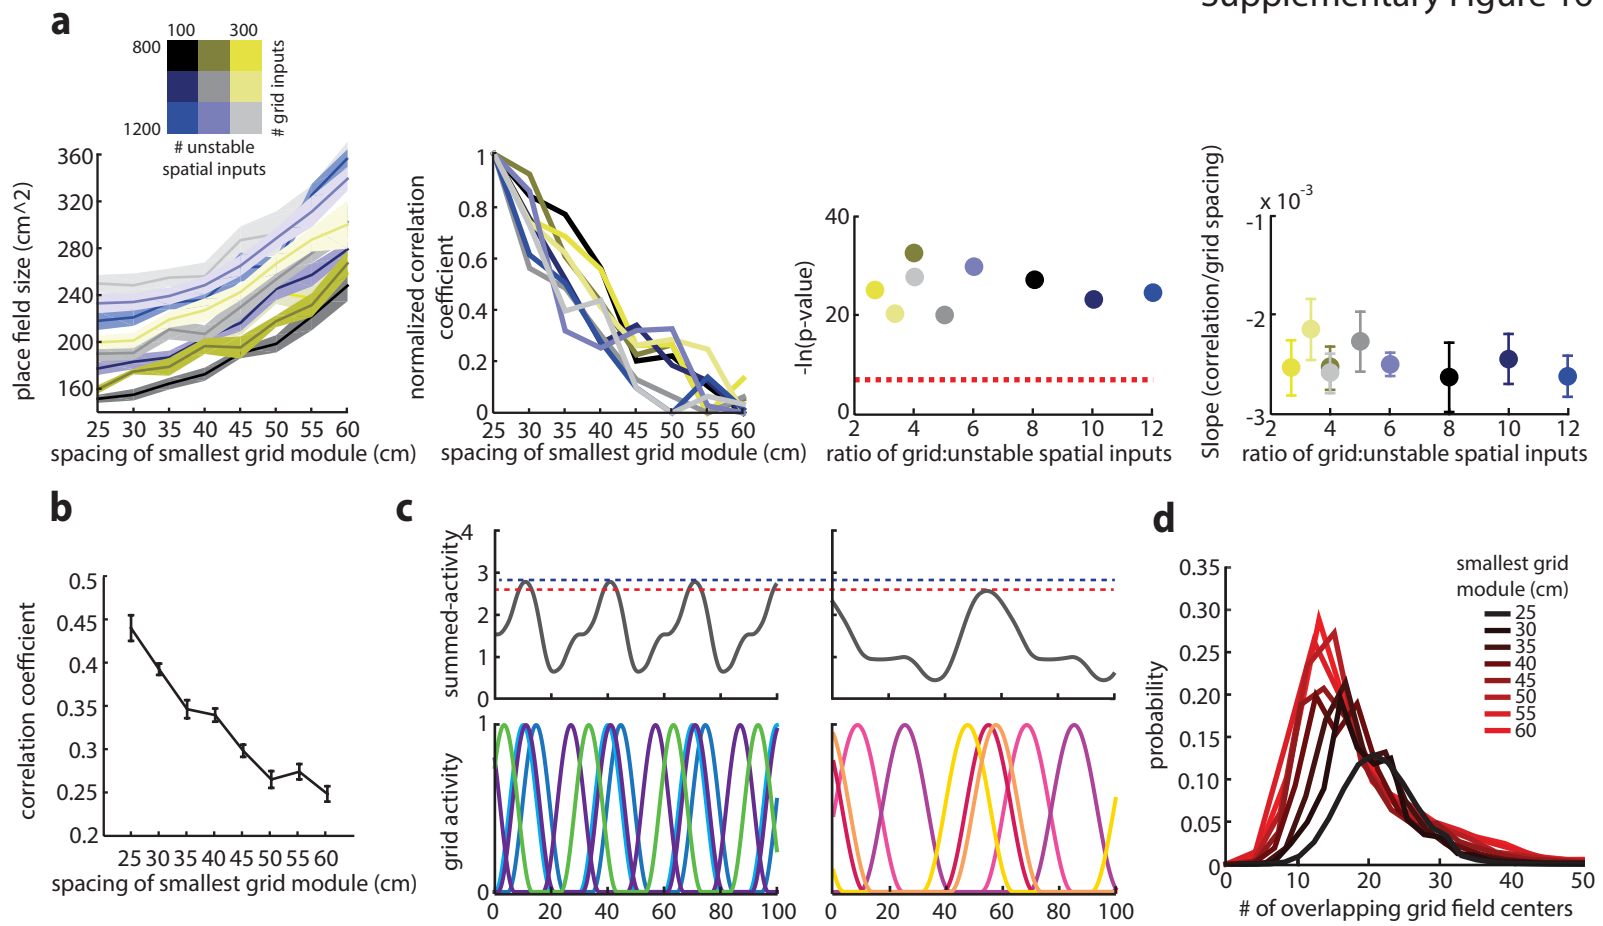

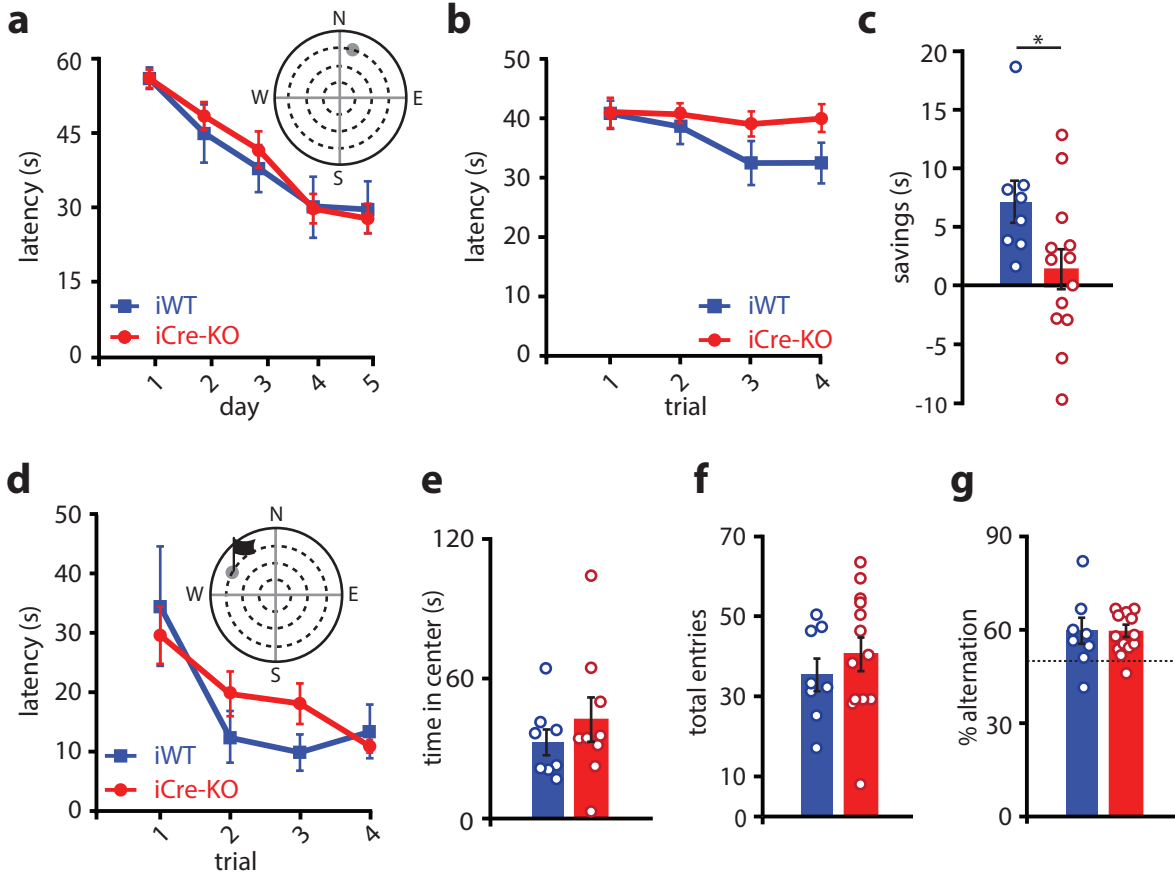

Supplement: NIHMS943103-supplement-1.pdf [file NIHMS943103-supplement-1.pdf]
